# Supplementary material for: Controlling Nutritional Status (CONUT) score as a predictor of all-cause mortality in elderly hypertensive patients: a prospective follow-up study
Source: PubMed Central journal article supplement — BMJ Open. 2017 Sep 18;7(9):e015649. doi: 10.1136/bmjopen-2016-015649 (PMC5623525; doi:10.1136/bmjopen-2016-015649), 2017-09-18
Supplement: bmjopen-2016-015649.draft_revisions.pdf [file bmjopen-2016-015649.draft_revisions.pdf]

# BMJ Open

BMJ Open is committed to open peer review. As part of this commitment we make the peer review history of every article we publish publicly available.

When an article is published we post the peer reviewers' comments and the authors' responses online. We also post the versions of the paper that were used during peer review. These are the versions that the peer review comments apply to.

The versions of the paper that follow are the versions that were submitted during the peer review process. They are not the versions of record or the final published versions. They should not be cited or distributed as the published version of this manuscript.

BMJ Open is an open access journal and the full, final, typeset and author-corrected version of record of the manuscript is available on our site with no access controls, subscription charges or pay-per-view fees (<http://bmjopen.bmj.com>).

If you have any questions on BMJ Open's open peer review process please email [info.bmjopen@bmj.com](mailto:info.bmjopen@bmj.com)

# BMJ Open

## Controlling Nutritional Status (CONUT) score as a good predictor of all-cause mortality in elderly hypertensive patients

|                                 |                                                                                                                                                                                                                                                                                                                               |
|---------------------------------|-------------------------------------------------------------------------------------------------------------------------------------------------------------------------------------------------------------------------------------------------------------------------------------------------------------------------------|
| Journal:                        | <i>BMJ Open</i>                                                                                                                                                                                                                                                                                                               |
| Manuscript ID                   | bmjopen-2016-015649                                                                                                                                                                                                                                                                                                           |
| Article Type:                   | Research                                                                                                                                                                                                                                                                                                                      |
| Date Submitted by the Author:   | 21-Dec-2016                                                                                                                                                                                                                                                                                                                   |
| Complete List of Authors:       | Sun, Xiaonan; Chinese People's Liberation Army General Hospital, Department of Geriatric Cardiology<br>Luo, Leiming; Chinese People's Liberation Army General Hospital, Department of Geriatric Cardiology<br>zhao, Xiaoqian; 305 hospital of PLA<br>Ye, Ping; Military General Hospital of Beijing PLA, Geriatric Cardiology |
| <b>Primary Subject Heading</b>: | Cardiovascular medicine                                                                                                                                                                                                                                                                                                       |
| Secondary Subject Heading:      | Cardiovascular medicine, Geriatric medicine                                                                                                                                                                                                                                                                                   |
| Keywords:                       | Nutritional status, CONUT, Hypertension < CARDIOLOGY, All-cause mortality                                                                                                                                                                                                                                                     |
|                                 |                                                                                                                                                                                                                                                                                                                               |

SCHOLARONE™  
Manuscripts

**Title page****Controlling Nutritional Status (CONUT) score as a good predictor of all-cause mortality in elderly hypertensive patients**

Xiaonan Sun<sup>1</sup>, Leiming Luo<sup>1</sup>, Xiaoqian Zhao<sup>2</sup>, Ping Ye<sup>1</sup>

1 Department of Geriatric Cardiology, Chinese People's Liberation Army General Hospital, Beijing, China,100853;

2 Department of Cardiology, Chinese People's Liberation Army 305 Hospital, Beijing, China,100000

\*Correspondence: Leiming Luo

Department of Geriatric Cardiology, Chinese People's Liberation Army General Hospital, 28 Fuxing Road, Beijing 100853, People's Republic of China

Tel +86 10 8862 6362

Fax +86 10 6687 6349

Email lleim@sina.com

**Running title: CONUT is good predictors for all-cause mortality in hypertension**

**Conflict of Interest:** The authors declare no conflict of interest.

## Abstract

**Objectives** The aim of this study was to elucidate the impact of the nutritional status on survival by Controlling Nutritional Status(CONUT) score and geriatric nutritional risk index (GNRI) in patients with hypertension whose age over 80 y. **Design** Prospective follow-up study. **Participants** A total of 336 hypertensive patients over 80 y were included to this study. **Outcome measures** All-cause death were record Kaplan–Meier curves were plotted to evaluate the association between the CONUT and the all-cause mortality at follow-up. Using Cox regression models to investigate the prognostic value of CONUT and GNRI for all-cause mortality in 90 day after admission. **Results** Patients with higher CONUT score link to high mortality in hypertensive patients in 90 day after admission (1.49% ,6.74%,15.38% respectively,  $\chi^2 = 30.92$ ,  $P=0.000$ ). Survival patients had a higher BMI ( $24.25 \pm 3.05$  vs  $24.25 \pm 3.05$ ,  $p=0.012$ ), Hemoglobin ( $123.78 \pm 17.05$  vs  $115.07 \pm 20.42$ ,  $P=0.040$ ), albumin level as well as lower FBS ( $6.90 \pm 2.48$  vs  $8.24 \pm 3.51$ ,  $p=0.010$ ). And also score higher in GRNI ( $99.42 \pm 6.55$  vs  $95.69 \pm 7.77$ ,  $p=0.002$ ) and lower for CONUT ( $3.13 \pm 1.98$  vs  $5.14 \pm 2.32$ ), which both indicated better nutritional status. Kaplan–Meier curves show the survival rates were significantly worse in the high CONUT group compared to the low CONUT group ( $\chi^2 = 13.372$ ,  $p=0.001$ ). Cox regression shown increasing hazard ratio (HR) was seen with increasing risk of CONUT (from normal to moderate to severe). HRs (95%CI) for three month mortality were 1.458(1.113-1.909). Both in RTI patients and other reason group, only CONUT was good predictor for all-cause mortality (HR=1.242, 95% confidence interval 1.062–1.452,  $P = 0.007$ ) in hypertensive patients over 80 y. **Conclusion** Nutritional status assessed using the CONUT, not by other nutrition index ,is good predictors for all-cause mortality in 90 days after admission. Evaluation of nutritional status may provide additional prognostic information in patients with hypertension, and the management of nutritional status is of great significance.

## Key word

Nutritional status; CONUT; Hypertension; All-cause mortality.

### **Strengths of this study**

Nutritional status assessed using the CONUT in hypertensive patients aged over 80y can efficiently predict all-cause mortality within 90 d post-admission.

With an increase in CONUT score, the incidence of all-cause mortality exhibits an increasing trend in both RTI and other reasons admission.

### **Limitation of this study**

(1) This study was a single center study that included a relatively small number of patients.

(2) Follow-up studies were performed for only 90 d

## **INTRODUCTION**

The nutritional status of patients has drawn increased attention in the clinical setting. An increasing number of evidence have shown that nutritional and immunologic status upon admission closely is associated with the outcome of patients with cardiovascular disease<sup>[1-3]</sup>. For elderly patients, the role of nutritional status is more important. Studies indicate that elderly patients with high nutritional risks were more likely to stay longer in the hospital than those without such risks<sup>[4]</sup>. Nutritional risk was also identified as an independent predictor of functional status and mortality among institutionalized elderly patients<sup>[5]</sup>.

Body mass index(BMI), serum albumin level, and pre albumin level are the most commonly indexes used for nutritional status evaluation in clinical settings. However, these single indexes exhibit limited clinical applications. Consequently, an improved nutritional index has been developed. An increasing number of complex nutritional

1  
2  
3  
4 indicators have emerged in recent years, providing substantial information. The  
5  
6 Geriatric Nutritional Risk Index (GNRI) is one of the most commonly used nutritional  
7  
8 indicators in the elderly<sup>[6]</sup>. The Controlling Nutritional Status (CONUT) score, which is  
9  
10 calculated based on the serum albumin concentration, total peripheral lymphocyte  
11  
12 count, and total cholesterol concentration, was developed as a screening tool for early  
13  
14 detection of poor nutritional status<sup>[7]</sup>. Each of these two indexes, GNRI and CONUT  
15  
16 score, provides good points for nutritional status evaluation, which are widely applied  
17  
18 in the evaluation of patients with tumor<sup>[8]</sup> and undergoing dialysis<sup>[9]</sup>. However, these  
19  
20 tools exhibit limited application in cardiovascular disease.  
21  
22  
23  
24

25  
26 Hypertension, the most commonly occurring disease in the elderly, usually  
27  
28 includes comorbidities in the elderly group. When elderly patients are hospitalized  
29  
30 because of infection or other reasons the effects of nutritional status on the prognosis  
31  
32 of patients have to be evaluated. The more appropriate nutritional index, i.e., GNRI or  
33  
34 CONUT score, to use in assessing such patients has to be properly selected. Studies  
35  
36 on these issues are rarely reported. This study aimed to elucidate the effect of  
37  
38 nutritional status on survival in patients with hypertension and aged over 80 y.  
39  
40  
41  
42

## 43 44 **METHODS**

### 45 46 **Patients**

47  
48 This study included patients with hypertension who were diagnosed using the  
49  
50 criteria listed in Chinese Hypertension Prevention Guide published in  
51  
52 2010<sup>[10]</sup>, hospitalized from January 2011 to December 2013, and aged >80. The current  
53  
54 study was conducted at the People's Liberation Army General Hospital and sought the  
55  
56  
57  
58  
59  
60

1  
2  
3  
4 full ethical approval of Human Investigation Committee. Informed consent was  
5  
6 obtained from each patient.  
7

### 8 9 **General information and medical history**

10  
11 General information, including age, sex, lifestyle (smoking and drinking) and  
12  
13 basic medical history were collected. Patients were selected based on height, weight,  
14  
15 resting heart rate, systolic blood pressure, and diastolic blood pressure.  
16  
17

### 18 19 **Detection of nutritional metabolism and related biochemical indexes**

20  
21 Routine blood test upon admission was conducted for all enrolled patients in the  
22  
23 Central Laboratory of our hospital. Detection indexes included white blood cells,  
24  
25 lymphocytes, platelet, hemoglobin (Hgb), serum creatinine (sCr), albumin (Alb), total  
26  
27 cholesterol (TC), triglyceride (TG), low-density lipoprotein cholesterol (LDL-C),  
28  
29 high-density lipoprotein cholesterol (HDL-C), fasting blood glucose (FBS), blood  
30  
31 urea nitrogen(BUN), uric acid(UA), pre albumin (PA), and electrolyte index.  
32  
33

34  
35 The nutritional status of each patient was also evaluated using two composite indexes:  
36  
37 CONUT score and GNRI. The CONUT score was determined in accordance with the  
38  
39 tool described in Table 1, which was first used by Ulibarri<sup>[7]</sup>. The GNRI combining  
40  
41 two nutritional indicators, albumin and actual weight compared with ideal body  
42  
43 weight, was developed by modifying the nutritional risk index for elderly patients. The  
44  
45 GNRI formula is as follows:  $GNRI = [1.487 * \text{serum albumin (g/L)}] t[41.7$   
46  
47  
48

49  
50  
51  $*\text{present/usual weight (kg)}]^{[6]}$ .  
52

### 53 54 **Follow-up**

55  
56 A follow-up on all selected subjects was conducted after admission for 90 don  
57  
58

1  
2  
3  
4 the average. Follow-up times were set to occur 7, 14, 30, and 90 days after admission.

5  
6 Follow-ups were conducted by interviewing each patient via telephone and reviewing  
7  
8 the medical record of the patient. All-cause mortality was determined at the end of the  
9  
10 follow-up period. Death was ascertained from the death record, i.e., a legal document  
11  
12 including time, site, and other information.  
13  
14

### 15 **Statistical analysis**

16  
17 All calculations were performed using SPSS ver. 22.0. For continuous  
18  
19 quantitative data, the K-S normality test was first conducted to analyze whether the  
20  
21 normal distribution and the normal distribution of quantitative data were analyzed by  
22  
23 the independent-samples t-test. Data that were not normally distributed were analyzed  
24  
25 by the Mann-Whitney U test. Pearson's chi-squared ( $\chi^2$ ) test was used to analyze  
26  
27 categorical variables. Survival curves were generated using the Kaplan-Meier method.  
28  
29 Multivariate analysis using a Cox proportional hazards model was used for  
30  
31 independent tests of significance. Two-tailed P values  $<0.05$  were considered to  
32  
33 indicate significance.  
34  
35  
36  
37  
38  
39

## 40 **RESULTS**

### 41 **Clinical characteristics**

42  
43 A total of 336 hypertensive patients were enrolled, including 323 males and 13  
44  
45 females, with an average age of  $87.39 \pm 5.23$  years. All patients were diagnosed as  
46  
47 hypertension ranging from 5-27 years and received antihypertensive drug  
48  
49 treatment. All patients had a history of CAD, 83 patients had a history of myocardial  
50  
51 infarction, 29 patients had received stent therapy, 67 cases suffered from chronic heart  
52  
53 failure, 167 cases had T2DM, and 124 had anemia. Of these cases, 192 were admitted  
54  
55  
56  
57  
58  
59  
60



1  
2  
3  
4 for respiratory tract infection(RTI), and the remaining 144 patients were admitted for  
5  
6 non-infective factors, such as angina pectoris and uncontrolled blood pressure, among  
7  
8 others.  
9

10  
11 The CONUT scores of the selected patients were determined, and analysis was  
12  
13 conducted by the group. The results are presented in Table 2. Only 5 patients scored  
14  
15 over 9, which indicated severe malnutrition. Thus, we combined the data with those of  
16  
17 moderate malnutrition for analysis. Heart rate and blood glucose level were higher in  
18  
19 people with high CONUT scores than in those with low CONUT scores. The  
20  
21 proportion of patients with poor nutritional status due to admission caused by RTI was  
22  
23 significantly high( $\chi^2=70.835, p=0.000$ ).  
24  
25  
26  
27

28  
29 Table 3 compares the nutritional index of patients with different reasons for  
30  
31 admission. Patients with RTI typically have low nutritional status, which shows low  
32  
33 BMI, albumin level, GNRI score, high FBS, and CONUT score upon admission.  
34  
35

### 36 **Follow-up results**

37  
38  
39 A total of 27 deaths were recorded in the 90-day follow-up, and most of these  
40  
41 deaths occurred during the period 30 to 90 d (n=17, 62.97%) post-admission. The  
42  
43 parameters and characteristics of different outcomes for the patients are presented in  
44  
45 Table 4. No differences in age, sex, and combination of diseases were indicated  
46  
47 between different outcomes. Likewise, no differences in systolic blood pressure were  
48  
49 found. However, the surviving patients showed increased BMI ( $24.25\pm 3.05$   
50  
51 vs.  $24.25\pm 3.05$ ,  $p=0.012$ ), hemoglobin ( $123.78\pm 17.05$  vs.  $115.07\pm 20.42$ ,  $P=0.040$ ), and  
52  
53 albumin level, as well as reduced DBP ( $62.48\pm 9.60$  vs.  $68.31\pm 12.02$ ,  $p=0.016$ ) and  
54  
55  
56  
57  
58  
59  
60

1  
2  
3  
4 FBS( $6.90\pm 2.48$  vs.  $8.24\pm 3.51$ , $p=0.010$ ).No significant difference in plasma pre  
5  
6 albumin level between different outcomes was indicated ( $19.21\pm 8.70$   
7  
8 vs. $16.25\pm 11.68$ , $p=0.200$ ).

9  
10  
11 Surviving patients obtained improved scores in GRNI( $99.42\pm 6.55$  vs.  
12  
13  $95.69\pm 7.77$ , $p=0.002$ )and reduced scores in CONUT( $3.13\pm 1.98$  vs.  $5.14\pm 2.32$ ), both of  
14  
15 which indicated improved nutritional status. We found that along with the increase in  
16  
17 CONUT score, which suggests worse malnutrition, the incidence of all-cause  
18  
19 mortality increased. The same tendency was not observed in the GRNI group, as  
20  
21 illustrated in Figure 1.  
22  
23  
24

#### 25 26 **Survival analysis according to CONUT and GNRI**

27  
28  
29 Survival curves based on different nutritional evaluations were plotted. The  
30  
31 survival rates were significantly lower in the high-CONUT group than in the  
32  
33 low-CONUT group( $\chi^2=13.372$ , $p=0.001$ ), as shown in Figure 2.The survival curves  
34  
35 based on the GNRI is shown in Figure 3. Differences among groups could not be  
36  
37 determined ( $\chi^2=7.694$ , $p=0.053$ ).  
38  
39  
40

#### 41 42 **Prognostic values of CONUT and GNRI**

43  
44 Multivariate Cox regression analyses were conducted to investigate the possible  
45  
46 predictors of all-cause mortality in the study population (Table 5).By regression, both  
47  
48 RTI and CONUT were independent predictors of three-month all-cause mortality.  
49  
50 Increasing hazard ratios (HR) were observed with increasing risks of CONUT (from  
51  
52 normal to moderate to severe). The HRs (95%CI) for the three-month mortality were  
53  
54  $1.458(1.113-1.909)$ .No significant correlation was indicated between the Alb level  
55  
56  
57  
58  
59  
60

1  
2  
3  
4 and all-cause mortality in such patients (HR=1.019, 95% confidence interval  
5  
6 0.774–1.810, P = 0.436); the same was found for the GNRI(HR=0.950, 95%  
7  
8 confidence interval 0.780–1.256, P = 0.717).

9  
10  
11 Given that RTI is an independent risk factor for all-cause mortality, we further  
12  
13 conducted Cox regression according to different reasons of admission, as shown in  
14  
15 Table 6. In the non-infection group, Alb, Hgb, GNRI, and CONUT could  
16  
17 independently predict all-cause mortality in hypertensive patients aged >80 y.  
18  
19 However, in RTI patients, only CONUT was identified as a good predictor of  
20  
21 all-cause mortality(HR=1.242, 95% confidence interval 1.062–1.452, P = 0.007).

## 22 23 24 25 26 **DISCUSSION**

27  
28  
29 The findings in this study indicated that nutritional status was associated with  
30  
31 90-day all-cause mortality in patients with hypertension and aged > 80 y. Moreover, a  
32  
33 CONUT score that was higher on admission was an independent predictor for  
34  
35 all-cause mortality(HR=1.458, 95% confidence interval 1.113–1.909, P = 0.006). With  
36  
37 increasing CONUT score, the incidence of all-cause mortality exhibits an increasing  
38  
39 trend in both RTI(HR=1.242, 95% confidence interval 1.062–1.452, P = 0.007) and in  
40  
41 other reasons (HR=2.440, 95% confidence interval 1.140–5.220, P = 0.021).

42  
43  
44  
45  
46 The relationship between nutritional status, particularly malnutrition, and  
47  
48 prognosis of patients with cardiovascular disease has drawn increasing interest<sup>[11]</sup>. In a  
49  
50 study including 2,251 patients with a mean age of 65.0±12.8 y, multiple logistic  
51  
52 regression analysis indicated that malnutrition was an independent factor influencing  
53  
54 post-MI complications<sup>[12]</sup>. A study of Chinese population confirmed that nutritional  
55  
56  
57  
58  
59  
60

1  
2  
3  
4 status was independently associated with the risk of all-cause mortality in geriatric  
5  
6 patients with CAD. Whether nutritional support in appropriate patients improves  
7  
8 clinical outcomes deserves further investigation<sup>[13]</sup>. A study involving subjects with  
9  
10 heart failure indicated that a poor nutritional status, as assessed using the CONUT  
11  
12 score, and atherosclerosis, as indicated by CIMT, was significantly associated with  
13  
14 inflammation and predicted poor outcomes in patients with CHF<sup>[14]</sup>. A relationship  
15  
16 between nutritional status and prognosis in patients with hypertension is rarely  
17  
18 observed; for elderly patients, such a relationship occurs even more rarely.  
19  
20  
21 CONUT is calculated using laboratory data, including albumin concentration,  
22  
23 lymphocyte count, and cholesterol level of the patients. This index can more  
24  
25 accurately reflect the nutritional status and immune function of the body. Previous  
26  
27 reports regarding prognosis evaluation mostly focused on tumor or liver diseases.  
28  
29  
30 Yoshida<sup>[15]</sup> found that a moderate or severe CONUT score was an independent risk  
31  
32 factor for any morbidity and severe morbidities for esophageal cancer. The study also  
33  
34 concluded that CONUT was a convenient and useful tool for nutritional status  
35  
36 assessment prior to esophagectomy. In patients with nasopharyngeal carcinoma, the  
37  
38 same conclusion was drawn<sup>[16]</sup>. Studies on cardiovascular disease are rarely reported.  
39  
40  
41 A study on STEMI patients showed that the CONUT score was associated with an  
42  
43 increased risk of all-cause mortality for both the unadjusted as well as the age- and  
44  
45 sex-adjusted models; in a full-adjusted model, the best predictors were age and  
46  
47 BNP<sup>[17]</sup>. In patients with chronic heart failure, a mean follow-up period of 28.4 months  
48  
49 revealed that patients experiencing cardiovascular events had impaired nutritional  
50  
51  
52  
53  
54  
55  
56  
57  
58  
59  
60

1  
2  
3  
4 status, higher CONUT scores, lower PNI scores, and lower GNRI scores, compared  
5  
6 with patients who did not experience cardiovascular events<sup>[18]</sup>. The current study  
7  
8 found that for patients with hypertension, only CONUT, not GNRI, is a good  
9  
10 predictor for all-cause mortality 3 month after admission.  
11  
12

13  
14 A study involving patients admitted to an acute geriatric unit showed that both  
15  
16 albumin and CONUT are identified as good predictors of short-and medium-term  
17  
18 mortality; however, the study adds little to the information provided by albumin  
19  
20 alone<sup>[19]</sup>, which differs from our conclusion. Our finding shows that for hypertensive  
21  
22 patients admitted for other reasons, albumin and CONUT are independent predictors  
23  
24 of all-cause mortality; however, for hypertensive patients suffering from RTI, only  
25  
26 CONUT can provide prognostic information. We therefore conclude that for admitted  
27  
28 patients with hypertension, CONUT is a preferable nutritional status index.  
29  
30  
31  
32

33  
34 GNRI, which is determined based on the albumin level and weight of the patient,  
35  
36 has also recently been used as a new index of nutritional assessment for elderly  
37  
38 patients<sup>[5 20]</sup>. Past studies found that a higher risk GNRI was positively correlated with  
39  
40 length of hospital stay; meanwhile, the association between a higher risk GNRI and  
41  
42 in-hospital mortality was not significant<sup>[21]</sup>. GNRI is the most widely used tool in  
43  
44 chronic kidney disease with or without dialysis<sup>[9 22 23]</sup>. Multivariate Cox proportional  
45  
46 hazards analysis demonstrated that GNRI <100, serum ferritin  $\geq$  500  $\mu$ g/L, and  
47  
48 age  $\geq$  65 y were significant predictors for mortality in hemodialysis  
49  
50 patients<sup>[24]</sup>. Increased GNRI was associated with increased CRP levels and low  
51  
52 lymphocyte counts after multivariable adjustment. Some studies have also reported on  
53  
54  
55  
56  
57  
58  
59  
60

1  
2  
3 GNRI as a prognostic factor in cardiovascular diseases<sup>[25 26]</sup>; however, in our study,  
4  
5  
6 we found that GNRI is not an independent predictor for all-cause mortality in patients  
7  
8  
9 with hypertension.

10  
11 The present study includes certain limitations. (1) This study was a single center  
12  
13 study that included a relatively small number of patients. (2) Follow-up studies were  
14  
15 performed for only 90 d;a further study is being conducted.  
16  
17

## 18 19 CONCLUSION

20  
21 We found that nutritional status assessed using the CONUT and not by other  
22  
23 nutritional index in patients with hypertension admitted to the hospital can efficiently  
24  
25 predict all-cause mortality within 90 d post-admission. With an increase in CONUT  
26  
27 score, which indicates malnutrition, the incidence of all-cause mortality exhibits an  
28  
29 increasing trend in both RTI(HR=1.242, 95% confidence interval1.062–1.452, P =  
30  
31 0.007) and other reasons (HR=2.440, 95% confidence interval1.140–5.220, P = 0.021).  
32  
33 Evaluation of nutritional status may provide additional prognostic information for  
34  
35 patients with hypertension, and management of nutritional status is highly significant.  
36  
37  
38  
39  
40  
41  
42  
43  
44  
45  
46  
47  
48  
49  
50  
51  
52  
53  
54  
55  
56  
57  
58  
59  
60  
61  
62  
63  
64  
65  
66  
67  
68  
69  
70  
71  
72  
73  
74  
75  
76  
77  
78  
79  
80  
81  
82  
83  
84  
85  
86  
87  
88  
89  
90  
91  
92  
93  
94  
95  
96  
97  
98  
99  
100  
101  
102  
103  
104  
105  
106  
107  
108  
109  
110  
111  
112  
113  
114  
115  
116  
117  
118  
119  
120  
121  
122  
123  
124  
125  
126  
127  
128  
129  
130  
131  
132  
133  
134  
135  
136  
137  
138  
139  
140  
141  
142  
143  
144  
145  
146  
147  
148  
149  
150  
151  
152  
153  
154  
155  
156  
157  
158  
159  
160  
161  
162  
163  
164  
165  
166  
167  
168  
169  
170  
171  
172  
173  
174  
175  
176  
177  
178  
179  
180  
181  
182  
183  
184  
185  
186  
187  
188  
189  
190  
191  
192  
193  
194  
195  
196  
197  
198  
199  
200  
201  
202  
203  
204  
205  
206  
207  
208  
209  
210  
211  
212  
213  
214  
215  
216  
217  
218  
219  
220  
221  
222  
223  
224  
225  
226  
227  
228  
229  
230  
231  
232  
233  
234  
235  
236  
237  
238  
239  
240  
241  
242  
243  
244  
245  
246  
247  
248  
249  
250  
251  
252  
253  
254  
255  
256  
257  
258  
259  
260  
261  
262  
263  
264  
265  
266  
267  
268  
269  
270  
271  
272  
273  
274  
275  
276  
277  
278  
279  
280  
281  
282  
283  
284  
285  
286  
287  
288  
289  
290  
291  
292  
293  
294  
295  
296  
297  
298  
299  
300  
301  
302  
303  
304  
305  
306  
307  
308  
309  
310  
311  
312  
313  
314  
315  
316  
317  
318  
319  
320  
321  
322  
323  
324  
325  
326  
327  
328  
329  
330  
331  
332  
333  
334  
335  
336  
337  
338  
339  
340  
341  
342  
343  
344  
345  
346  
347  
348  
349  
350  
351  
352  
353  
354  
355  
356  
357  
358  
359  
360  
361  
362  
363  
364  
365  
366  
367  
368  
369  
370  
371  
372  
373  
374  
375  
376  
377  
378  
379  
380  
381  
382  
383  
384  
385  
386  
387  
388  
389  
390  
391  
392  
393  
394  
395  
396  
397  
398  
399  
400  
401  
402  
403  
404  
405  
406  
407  
408  
409  
410  
411  
412  
413  
414  
415  
416  
417  
418  
419  
420  
421  
422  
423  
424  
425  
426  
427  
428  
429  
430  
431  
432  
433  
434  
435  
436  
437  
438  
439  
440  
441  
442  
443  
444  
445  
446  
447  
448  
449  
450  
451  
452  
453  
454  
455  
456  
457  
458  
459  
460  
461  
462  
463  
464  
465  
466  
467  
468  
469  
470  
471  
472  
473  
474  
475  
476  
477  
478  
479  
480  
481  
482  
483  
484  
485  
486  
487  
488  
489  
490  
491  
492  
493  
494  
495  
496  
497  
498  
499  
500  
501  
502  
503  
504  
505  
506  
507  
508  
509  
510  
511  
512  
513  
514  
515  
516  
517  
518  
519  
520  
521  
522  
523  
524  
525  
526  
527  
528  
529  
530  
531  
532  
533  
534  
535  
536  
537  
538  
539  
540  
541  
542  
543  
544  
545  
546  
547  
548  
549  
550  
551  
552  
553  
554  
555  
556  
557  
558  
559  
560  
561  
562  
563  
564  
565  
566  
567  
568  
569  
570  
571  
572  
573  
574  
575  
576  
577  
578  
579  
580  
581  
582  
583  
584  
585  
586  
587  
588  
589  
590  
591  
592  
593  
594  
595  
596  
597  
598  
599  
600  
601  
602  
603  
604  
605  
606  
607  
608  
609  
610  
611  
612  
613  
614  
615  
616  
617  
618  
619  
620  
621  
622  
623  
624  
625  
626  
627  
628  
629  
630  
631  
632  
633  
634  
635  
636  
637  
638  
639  
640  
641  
642  
643  
644  
645  
646  
647  
648  
649  
650  
651  
652  
653  
654  
655  
656  
657  
658  
659  
660  
661  
662  
663  
664  
665  
666  
667  
668  
669  
670  
671  
672  
673  
674  
675  
676  
677  
678  
679  
680  
681  
682  
683  
684  
685  
686  
687  
688  
689  
690  
691  
692  
693  
694  
695  
696  
697  
698  
699  
700  
701  
702  
703  
704  
705  
706  
707  
708  
709  
710  
711  
712  
713  
714  
715  
716  
717  
718  
719  
720  
721  
722  
723  
724  
725  
726  
727  
728  
729  
730  
731  
732  
733  
734  
735  
736  
737  
738  
739  
740  
741  
742  
743  
744  
745  
746  
747  
748  
749  
750  
751  
752  
753  
754  
755  
756  
757  
758  
759  
760  
761  
762  
763  
764  
765  
766  
767  
768  
769  
770  
771  
772  
773  
774  
775  
776  
777  
778  
779  
780  
781  
782  
783  
784  
785  
786  
787  
788  
789  
790  
791  
792  
793  
794  
795  
796  
797  
798  
799  
800  
801  
802  
803  
804  
805  
806  
807  
808  
809  
810  
811  
812  
813  
814  
815  
816  
817  
818  
819  
820  
821  
822  
823  
824  
825  
826  
827  
828  
829  
830  
831  
832  
833  
834  
835  
836  
837  
838  
839  
840  
841  
842  
843  
844  
845  
846  
847  
848  
849  
850  
851  
852  
853  
854  
855  
856  
857  
858  
859  
860  
861  
862  
863  
864  
865  
866  
867  
868  
869  
870  
871  
872  
873  
874  
875  
876  
877  
878  
879  
880  
881  
882  
883  
884  
885  
886  
887  
888  
889  
890  
891  
892  
893  
894  
895  
896  
897  
898  
899  
900  
901  
902  
903  
904  
905  
906  
907  
908  
909  
910  
911  
912  
913  
914  
915  
916  
917  
918  
919  
920  
921  
922  
923  
924  
925  
926  
927  
928  
929  
930  
931  
932  
933  
934  
935  
936  
937  
938  
939  
940  
941  
942  
943  
944  
945  
946  
947  
948  
949  
950  
951  
952  
953  
954  
955  
956  
957  
958  
959  
960  
961  
962  
963  
964  
965  
966  
967  
968  
969  
970  
971  
972  
973  
974  
975  
976  
977  
978  
979  
980  
981  
982  
983  
984  
985  
986  
987  
988  
989  
990  
991  
992  
993  
994  
995  
996  
997  
998  
999  
1000

## 46 47 Acknowledgements

48  
49 I would like to extend my sincere gratitude to professor Xue Changyong, for his  
50  
51 instructive advice and useful suggestions on my thesis.  
52  
53

## 54 55 Contributors

56  
57 SXN, LLM and YP contributed to the design of the review. SXN, ZXQ acquired  
58  
59 the data. SXN, LLM, and contributed to analysis. SXN wrote the draft. SXN,  
60

LLM, ZXQ and YP critically revised the intellectual content of this work.

### Funding

This study is funded by a grant from the Chinese PLA Health Project (Project ID:12BJZ34).

### Competing interests

The authors declare no conflict of interest.

### Data sharing statement

No additional data are available.

### Conflict of Interest

Table 1. Screening Tool for Controlling Nutritional Status or CONUT

Table 1. Screening Tool for Controlling Nutritional Status or CONUT

| Parameter                   | Requirements | Score |
|-----------------------------|--------------|-------|
| Albumin(g/l)                | $\geq 35$    | 0     |
|                             | 30-34        | 2     |
|                             | 25-29        | 4     |
|                             | $< 25$       | 6     |
| Total lymphocyte count(/ml) | $\geq 1600$  | 0     |
|                             | 1200-1599    | 1     |
|                             | 800-1199     | 2     |
|                             | $< 800$      | 3     |
| Total cholesterol(mmol/l)   | $\geq 4.65$  | 0     |
|                             | 3.62-4.64    | 1     |
|                             | 2.58-3.61    | 2     |
|                             | $< 2.58$     | 3     |

Dysnutritional states: Normal 0-1; Mild 2-4; Moderate 5-8; Severe 9-12

Table 2 Characteristics of the study population and nutritional parameters based on

1  
2  
3  
4 nutritional status  
5  
6  
7

8 Table 2 Characteristics of the study population and nutritional parameters based on nutritional  
9 status

|                                            | Normal<br>(CONUT=0–1,n=67) | Mild<br>malnutrition<br>(CONUT<br>2–4,n=178) | Moderate–severe<br>malnutrition<br>(CONUT<br>≥5,n=91) | P     |
|--------------------------------------------|----------------------------|----------------------------------------------|-------------------------------------------------------|-------|
| Age(year, $\bar{x} \pm s$ )                | 87.24±4.75                 | 87.18±4.95                                   | 87.75±5.56                                            | 0.638 |
| Male(n,%)                                  | 64 (95.52)                 | 169 (94.54)                                  | 90(98.90)                                             | 0.270 |
| Smoking history(n,%)                       | 19(28.36)                  | 60(33.71)                                    | 44(48.35)                                             | 0.018 |
| Anemia(n,%)                                | 20(29.85)                  | 63(35.39)                                    | 41(45.05)                                             | 0.129 |
| DM(n,%)                                    | 37(55.22)                  | 93(52.24)                                    | 34(37.36)                                             | 0.035 |
| Admission for RTI(n,%)                     | 18(26.86)                  | 91 (51.12)                                   | 83(91.21)                                             | 0.000 |
| SBP (mmHg, $\bar{x} \pm s$ )               | 129.49±15.11               | 133.96±18.88                                 | 134.04±19.92                                          | 0.236 |
| DBP (mmHg, $\bar{x} \pm s$ )               | 67.85±9.40                 | 67.71±13.03                                  | 68.50±11.03                                           | 0.953 |
| HR (beat/min, $\bar{x} \pm s$ )            | 70.97±12.94                | 73.22±14.61                                  | 82.20±17.46                                           | 0.000 |
| BMI (kg/m <sup>2</sup> , $\bar{x} \pm s$ ) | 25.08±3.10                 | 24.15±3.09                                   | 23.03±2.73                                            | 0.010 |
| Hgb(g/l, $\bar{x} \pm s$ )                 | 125.06±17.23               | 123.01±16.81                                 | 122.64±18.76                                          | 0.475 |
| TC(mmol/l, $\bar{x} \pm s$ )               | 4.53±0.08                  | 2.77±1.60                                    | 0.93±1.51                                             | 0.000 |
| TG(mmol/l, $\bar{x} \pm s$ )               | 1.85±1.28                  | 1.15±1.02                                    | 0.54±0.27                                             | 0.000 |
| LDL-C(mmol/l, $\bar{x} \pm s$ )            | 2.63±0.61                  | 1.76±0.72                                    | 1.53±0.71                                             | 0.000 |
| HDL-C(mmol/l, $\bar{x} \pm s$ )            | 1.16±0.36                  | 1.03±0.46                                    | 1.03±0.48                                             | 0.104 |
| Scr(mmol/l, $\bar{x} \pm s$ )              | 106.66±44.72               | 109.24±53.41                                 | 110.03±59.36                                          | 0.941 |
| BUN(mmol/l, $\bar{x} \pm s$ )              | 8.18±3.95                  | 9.20±4.61                                    | 10.21±4.76                                            | 0.016 |
| UA(umol/l, $\bar{x} \pm s$ )               | 335.51±101.25              | 347.15±97.37                                 | 321.76±109.13                                         | 0.081 |
| TP(g/l, $\bar{x} \pm s$ )                  | 69.40±5.25                 | 68.75±6.36                                   | 65.90±7.56                                            | 0.000 |
| Albumin(g/l, $\bar{x} \pm s$ )             | 40.13±3.31                 | 39.49±3.50                                   | 35.83±4.73                                            | 0.000 |
| FBS(mmol/l, $\bar{x} \pm s$ )              | 6.26±2.41                  | 7.11±2.64                                    | 7.39±2.60                                             | 0.021 |
| Prealbumin(mg/dl, $\bar{x} \pm s$ )        | 10.76±12.88                | 17.02±12.05                                  | 19.15±7.25                                            | 0.000 |

46  
47  
48  
49  
50 Table 3 Characteristics of the study population and nutritional parameters by different  
51 admission reasons  
52  
53  
54  
55  
56  
57  
58  
59  
60



Table 3 Characteristics of the study population and nutritional parameters by different admission reasons

|                         | RTI<br>(n=192) | Other causes<br>(n=144) | Statistical<br>value | P     |
|-------------------------|----------------|-------------------------|----------------------|-------|
| Age(year)               | 87.56±5.29     | 87.25±5.11              | 0.292                | 0.589 |
| Male(n,%)               | 185(96.35%)    | 143(95.97%)             | 0.033                | 0.855 |
| Smoking<br>history(n,%) | 77(40.1%)      | 46(30.87%)              | 3.101                | 0.078 |
| DM(n,%)                 | 88(45.83%)     | 79(53.02%)              | 1.734                | 0.188 |
| Hyperlipidemia(n,%)     | 98(51.04%)     | 79(53.02%)              | 0.132                | 0.717 |
| BMI(kg/m <sup>2</sup> ) | 23.68±3.16     | 24.53±3.00              | 4.991                | 0.026 |
| TP(g/l)                 | 67.79±7.65     | 68.08±5.67              | 0.150                | 0.699 |
| Alb(g/l)                | 37.43±4.62     | 40.00±5.25              | 33.01                | 0.000 |
| Hemoglobin(g/l)         | 122.69±19.10   | 123.61±15.14            | 0.235                | 0.628 |
| Creatinine (umol/l)     | 109.40±56.54   | 108.73±48.46            | 0.013                | 0.909 |
| BUN(mmol/l)             | 9.92±5.10      | 8.53±3.84               | 7.670                | 0.006 |
| FBS(mmol/l)             | 7.63±2.75      | 6.19±2.14               | 27.98                | 0.000 |
| UA(mmol/l)              | 328.74±102.06  | 350.96±104.49           | 3.875                | 0.050 |
| Pre albumin(mg/dl)      | 18.73±8.89     | 13.58±13.65             | 17.645               | 0.000 |
| GRNI score              | 97.72±7.68     | 100.49±5.35             | 11.822               | 0.001 |
| CONUT score             | 4.19±2.08      | 2.09±1.34               | 112.593              | 0.000 |

Table 4 Comparison of the characteristics of the study population and laboratory parameters by different outcomes

Table 4 Comparison of the characteristics of the study population and laboratory parameters by different outcomes

|                          | Death for all cause<br>(n=27) | Survival<br>(n=314) | P     |
|--------------------------|-------------------------------|---------------------|-------|
| Age(year)                | 89.29±4.57                    | 87.26±5.25          | 0.052 |
| Male (n, %)              | 27(100)                       | 308(98.08)          | 0.281 |
| DM (n,%)                 | 15 (55.56)                    | 152 (48.41)         | 0.304 |
| Hyperlipidemia (n,%)     | 12 (44.44)                    | 165 (52.55)         | 0.431 |
| CKD (n,%)                | 9(33.33)                      | 88(28.02)           | 0.667 |
| Anemia (n,%)             | 13(48.15)                     | 112(35.67)          | 0.206 |
| SBP (mmHg)               | 133.29±18.43                  | 126.85±20.16        | 0.085 |
| DBP (mmHg)               | 68.31±12.02                   | 62.48±9.60          | 0.016 |
| BMI (kg/m <sup>2</sup> ) | 22.31±3.31                    | 24.25±3.05          | 0.012 |
| TP(g/l)                  | 67.85±9.59                    | 67.92±6.58          | 0.962 |
| Alb(g/l)                 | 36.37±5.00                    | 38.74±4.16          | 0.005 |
| Hemoglobin (g/l)         | 115.07±20.42                  | 123.78±17.05        | 0.040 |
| Creatinine (umol/l)      | 110.74±61.19                  | 108.97±52.44        | 0.868 |
| BUN(mmol/l)              | 10.86±4.64                    | 9.18±4.62           | 0.071 |
| FBS(mmol/l)              | 8.24±3.51                     | (6.90±2.48)         | 0.010 |
| UA(mmol/l)               | 312.00±82.94                  | 340.72±105.31       | 0.169 |
| Prealbumin(mg/dl)        | 19.21±8.70                    | 16.25±11.68         | 0.200 |
| COUNT score              | 5.14±2.32                     | 3.13±1.98           | 0.000 |
| GNRI                     | 95.69±7.77                    | 99.42±6.55          | 0.026 |

DM: diabetes mellitus; SBP:systolic blood pressure; DBP: diastolic blood pressure;  
BMI:body mass index; TP:total protein; Alb: albumin; BUN:blood urea nitrogen; UA:uric acid

Table 5 Multivariate Cox regression for all-cause mortality

Table 5 Multivariate Cox regression for all-cause mortality

|            | B      | Wald  | Sig   | HR    | 95%CI       |
|------------|--------|-------|-------|-------|-------------|
| RTI        | 0.971  | 4.808 | 0.028 | 2.641 | 1.109–6.29  |
| Age        | 0.093  | 2.92  | 0.087 | 1.097 | 0.980–1.220 |
| BMI        | -0.121 | 0.642 | 0.423 | 1.184 | 0.660–1.191 |
| Alb        | 0.109  | 0.606 | 0.436 | 1.019 | 0.774–1.810 |
| Prealbumin | -2.352 | 0.607 | 0.436 | 0.095 | 0.00–35.271 |
| GNRI       | -0.520 | 0.132 | 0.717 | 0.950 | 0.780–1.256 |
| CONUT      | 0.377  | 7.511 | 0.006 | 1.458 | 1.113–1.909 |

Table 6. Cox regression analysis of common nutritional evaluation index for possible

Table 6. Cox regression analysis of common nutritional evaluation index for possible predictors of all-cause mortality by reason of admission

|            | Adjusted HR with 95% CI for RTI |             |      | Adjusted HR with 95% CI for other reasons |             |      |
|------------|---------------------------------|-------------|------|-------------------------------------------|-------------|------|
|            | HR                              | 95%CI       | P    | HR                                        | 95%CI       | P    |
| BMI        | 0.980                           | 0.958–1.003 | .084 | 0.629                                     | 0.354–1.107 | .114 |
| Alb        | 0.989                           | 0.904–1.082 | .810 | 0.649                                     | 0.439–0.958 | .030 |
| Hgb        | 0.982                           | 0.962–1.003 | .092 | 0.891                                     | 0.800–0.992 | .035 |
| Prealbumin | 1.013                           | 0.969–1.060 | .092 | 1.034                                     | 0.941–1.137 | .448 |
| GNRI       | 0.995                           | 0.929–1.066 | .897 | 0.692                                     | 0.500–0.957 | .026 |
| CONUT      | 1.242                           | 1.062–1.452 | .007 | 2.440                                     | 1.14–5.22   | .021 |

predictors of all-cause mortality by reason of admission

Figure 1. All-cause mortality in different nutritional status.

Figure 2. Kaplan–Meier survival curves for the CONUT

Figure 3 Kaplan–Meier survival curves for the GNRI

## REFERENCE

1. Anaszewicz M, Budzynski J. Clinical significance of nutritional status in patients with atrial fibrillation:

- 1  
2  
3 An overview of current evidence. *Journal of cardiology* 2016 doi:  
4 10.1016/j.jjcc.2016.06.014[published Online First: Epub Date]].
- 5  
6 2. Arodiwe I, Chinawa J, Ujunwa F, et al. Nutritional status of congenital heart disease (CHD) patients:  
7 Burden and determinant of malnutrition at university of Nigeria teaching hospital Ituku -  
8 Ozalla, Enugu. *Pakistan journal of medical sciences* 2015;**31**(5):1140-5 doi:  
9 10.12669/pjms.315.6837[published Online First: Epub Date]].
- 10  
11 3. Das UN. Nutritional factors in the prevention and management of coronary artery disease and heart  
12 failure. *Nutrition* 2015;**31**(2):283-91 doi: 10.1016/j.nut.2014.08.011[published Online First:  
13 Epub Date]].
- 14  
15 4. Cereda E, Klersy C, Pedrolli C, et al. The Geriatric Nutritional Risk Index predicts hospital length of  
16 stay and in-hospital weight loss in elderly patients. *Clinical nutrition* 2015;**34**(1):74-8 doi:  
17 10.1016/j.clnu.2014.01.017[published Online First: Epub Date]].
- 18  
19 5. Cereda E, Pedrolli C, Zagami A, et al. Nutritional risk, functional status and mortality in newly  
20 institutionalised elderly. *The British journal of nutrition* 2013;**110**(10):1903-9 doi:  
21 10.1017/S0007114513001062[published Online First: Epub Date]].
- 22  
23 6. Cereda E, Pedrolli C. The use of the Geriatric Nutritional Risk Index (GNRI) as a simplified nutritional  
24 screening tool. *The American journal of clinical nutrition* 2008;**87**(6):1966-7; author reply 67
- 25  
26 7. Ignacio de Ulibarri J, Gonzalez-Madrono A, de Villar NG, et al. CONUT: a tool for controlling  
27 nutritional status. First validation in a hospital population. *Nutricion hospitalaria*  
28 2005;**20**(1):38-45
- 29  
30 8. Iseki Y, Shibutani M, Maeda K, et al. Impact of the Preoperative Controlling Nutritional Status  
31 (CONUT) Score on the Survival after Curative Surgery for Colorectal Cancer. *PloS one*  
32 2015;**10**(7):e0132488 doi: 10.1371/journal.pone.0132488[published Online First: Epub  
33 Date]].
- 34  
35 9. Beberashvili I, Azar A, Sinuani I, et al. Geriatric nutritional risk index, muscle function, quality of life  
36 and clinical outcome in hemodialysis patients. *Clinical nutrition* 2016 doi:  
37 10.1016/j.clnu.2016.04.010[published Online First: Epub Date]].
- 38  
39 10. Liu LS, Writing Group of Chinese Guidelines for the Management of H. [2010 Chinese guidelines for  
40 the management of hypertension]. *Zhonghua xin xue guan bing za zhi* 2011;**39**(7):579-615
- 41  
42 11. Luke JN, Schmidt DF, Ritte R, et al. Nutritional predictors of chronic disease in a Central Australian  
43 Aboriginal cohort: A multi-mixture modelling analysis. *Nutrition, metabolism, and*  
44 *cardiovascular diseases : NMCD* 2016;**26**(2):162-8 doi:  
45 10.1016/j.numecd.2015.11.009[published Online First: Epub Date]].
- 46  
47 12. Yoo SH, Kook HY, Hong YJ, et al. Influence of undernutrition at admission on clinical outcomes in  
48 patients with acute myocardial infarction. *Journal of cardiology* 2016 doi:  
49 10.1016/j.jjcc.2016.05.009[published Online First: Epub Date]].
- 50  
51 13. Huang BT, Peng Y, Liu W, et al. Nutritional State Predicts All-Cause Death Independent of  
52 Comorbidities in Geriatric Patients with Coronary Artery Disease. *The journal of nutrition,*  
53 *health & aging* 2016;**20**(2):199-204 doi: 10.1007/s12603-015-0572-2[published Online First:  
54 Epub Date]].
- 55  
56 14. Nakagomi A, Kohashi K, Morisawa T, et al. Nutritional Status is Associated with Inflammation and  
57 Predicts a Poor Outcome in Patients with Chronic Heart Failure. *Journal of atherosclerosis and*  
58 *thrombosis* 2016;**23**(6):713-27 doi: 10.5551/jat.31526[published Online First: Epub Date]].
- 59  
60 15. Yoshida N, Baba Y, Shigaki H, et al. Preoperative Nutritional Assessment by Controlling Nutritional

- 1  
2  
3 Status (CONUT) is Useful to estimate Postoperative Morbidity After Esophagectomy for  
4 Esophageal Cancer. *World journal of surgery* 2016;**40**(8):1910-7 doi:  
5 10.1007/s00268-016-3549-3[published Online First: Epub Date] | .  
6
- 7 16. Du X-J, Tang L-L, Mao Y-P, et al. Value of the prognostic nutritional index and weight loss in  
8 predicting metastasis and long-term mortality in nasopharyngeal carcinoma. *Journal of*  
9 *Translational Medicine* 2015;**13**(1) doi: 10.1186/s12967-015-0729-0[published Online First:  
10 Epub Date] | .  
11
- 12 17. Basta G, Chatzianagnostou K, Paradossi U, et al. The prognostic impact of objective nutritional  
13 indices in elderly patients with ST-elevation myocardial infarction undergoing primary  
14 coronary intervention. *International journal of cardiology* 2016;**221**:987-92 doi:  
15 10.1016/j.ijcard.2016.07.039[published Online First: Epub Date] | .  
16
- 17 18. Narumi T, Arimoto T, Funayama A, et al. Prognostic importance of objective nutritional indexes in  
18 patients with chronic heart failure. *Journal of cardiology* 2013;**62**(5):307-13 doi:  
19 10.1016/j.jjcc.2013.05.007[published Online First: Epub Date] | .  
20
- 21 19. Cabre M, Ferreiro C, Arus M, et al. Evaluation of CONUT for Clinical Malnutrition Detection and  
22 Short-Term Prognostic Assessment in Hospitalized Elderly People. *The journal of nutrition,*  
23 *health & aging* 2015;**19**(7):729-33 doi: 10.1007/s12603-015-0536-6[published Online First:  
24 Epub Date] | .  
25
- 26 20. Cereda E, Pedrolli C, Zagami A, et al. Nutritional screening and mortality in newly institutionalised  
27 elderly: a comparison between the geriatric nutritional risk index and the mini nutritional  
28 assessment. *Clinical nutrition* 2011;**30**(6):793-8 doi: 10.1016/j.clnu.2011.04.006[published  
29 Online First: Epub Date] | .  
30
- 31 21. Gartner S, Kraft M, Kruger J, et al. Geriatric nutritional risk index correlates with length of hospital  
32 stay and inflammatory markers in older inpatients. *Clinical nutrition* 2016 doi:  
33 10.1016/j.clnu.2016.06.019[published Online First: Epub Date] | .  
34
- 35 22. Formiga F, Ferrer A, Cruzado JM, et al. Geriatric assessment and chronic kidney disease in the  
36 oldest old: the Octabaix study. *European journal of internal medicine* 2012;**23**(6):534-8 doi:  
37 10.1016/j.ejim.2012.03.009[published Online First: Epub Date] | .  
38
- 39 23. Beberashvili I, Erlich A, Azar A, et al. Longitudinal Study of Serum Uric Acid, Nutritional Status, and  
40 Mortality in Maintenance Hemodialysis Patients. *Clinical journal of the American Society of*  
41 *Nephrology : CJASN* 2016;**11**(6):1015-23 doi: 10.2215/CJN.10400915[published Online First:  
42 Epub Date] | .  
43
- 44 24. Edalat-Nejad M, Zamani F, Qlich-Khani M, et al. Geriatric nutritional risk index: a mortality  
45 predictor in hemodialysis patients. *Saudi journal of kidney diseases and transplantation : an*  
46 *official publication of the Saudi Center for Organ Transplantation, Saudi Arabia*  
47 *2015*;**26**(2):302-8  
48
- 49 25. Kaneko H, Suzuki S, Goto M, et al. Geriatric nutritional risk index in hospitalized heart failure  
50 patients. *International journal of cardiology* 2015;**181**:213-5 doi:  
51 10.1016/j.ijcard.2014.11.167[published Online First: Epub Date] | .  
52
- 53 26. Maruyama K, Nakagawa N, Saito E, et al. Malnutrition, renal dysfunction and left ventricular  
54 hypertrophy synergistically increase the long-term incidence of cardiovascular events.  
55 *Hypertens Res* 2016;**39**(9):633-9 doi: 10.1038/hr.2016.47[published Online First: Epub Date] | .  
56  
57  
58  
59  
60

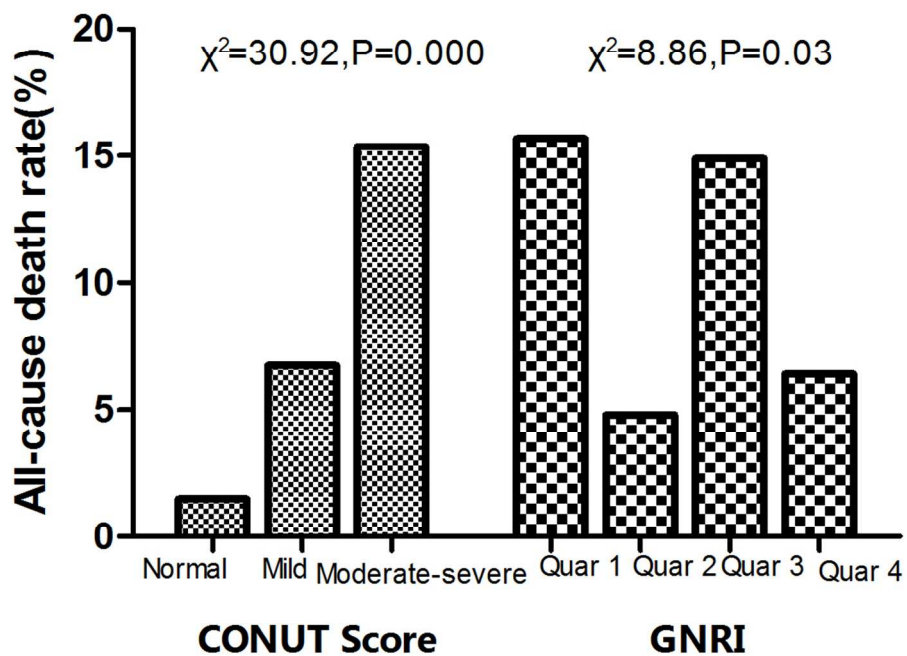

All-cause mortality in different nutritional status.

99x75mm (300 x 300 DPI)

ew only

1  
2  
3  
4  
5  
6  
7  
8  
9  
10  
11  
12  
13  
14  
15  
16  
17  
18  
19  
20  
21  
22  
23  
24  
25  
26  
27  
28  
29  
30  
31  
32  
33  
34  
35  
36  
37  
38  
39  
40  
41  
42  
43  
44  
45  
46  
47  
48  
49  
50  
51  
52  
53  
54  
55  
56  
57  
58  
59  
60

1  
2  
3  
4  
5  
6  
7  
8  
9  
10  
11  
12  
13  
14  
15  
16  
17  
18  
19  
20  
21  
22  
23  
24  
25  
26  
27  
28  
29  
30  
31  
32  
33  
34  
35  
36  
37  
38  
39  
40  
41  
42  
43  
44  
45  
46  
47  
48  
49  
50  
51  
52  
53  
54  
55  
56  
57  
58  
59  
60

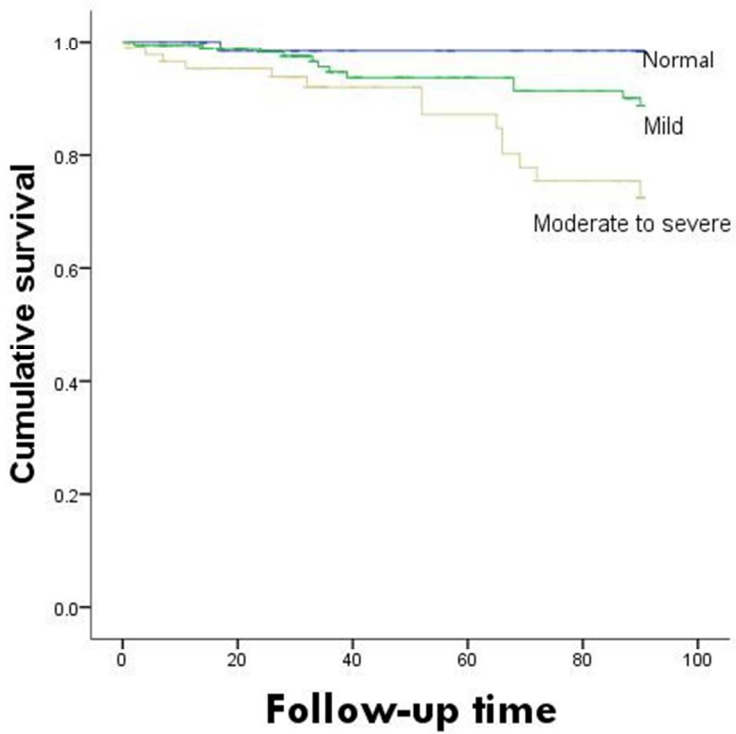

Kaplan-Meier survival curves for the CONUT

220x176mm (72 x 72 DPI)

For peer review only

1  
2  
3  
4  
5  
6  
7  
8  
9  
10  
11  
12  
13  
14  
15  
16  
17  
18  
19  
20  
21  
22  
23  
24  
25  
26  
27  
28  
29  
30  
31  
32  
33  
34  
35  
36  
37  
38  
39  
40  
41  
42  
43  
44  
45  
46  
47  
48  
49  
50  
51  
52  
53  
54  
55  
56  
57  
58  
59  
60

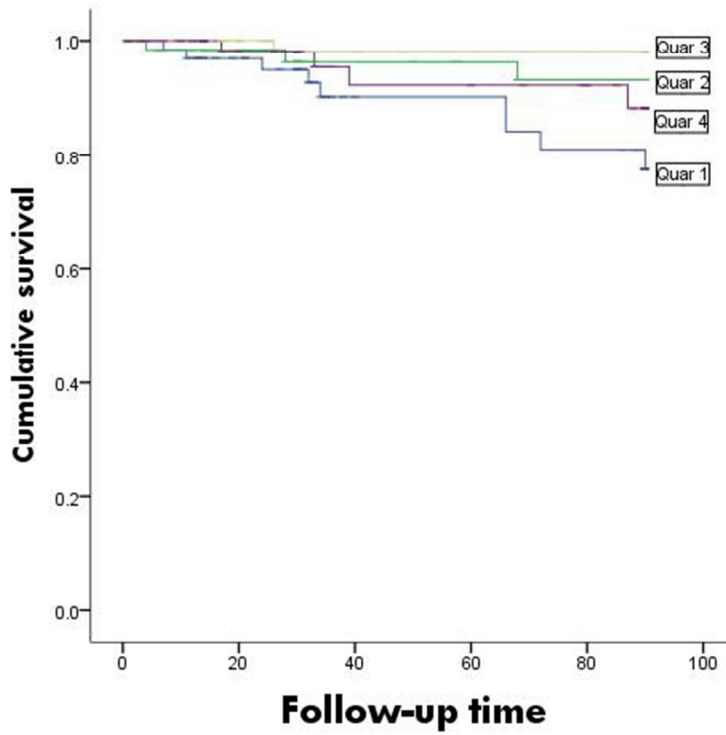

Kaplan–Meier survival curves for the GNRI

220x176mm (72 x 72 DPI)

Peer Review Only



# BMJ Open

## Controlling Nutritional Status (CONUT) score as an effective predictor of all-cause mortality in elderly hypertensive patients

|                                 |                                                                                                                                                                                                                                                                                                                               |
|---------------------------------|-------------------------------------------------------------------------------------------------------------------------------------------------------------------------------------------------------------------------------------------------------------------------------------------------------------------------------|
| Journal:                        | <i>BMJ Open</i>                                                                                                                                                                                                                                                                                                               |
| Manuscript ID                   | bmjopen-2016-015649.R1                                                                                                                                                                                                                                                                                                        |
| Article Type:                   | Research                                                                                                                                                                                                                                                                                                                      |
| Date Submitted by the Author:   | 31-Mar-2017                                                                                                                                                                                                                                                                                                                   |
| Complete List of Authors:       | Sun, Xiaonan; Chinese People's Liberation Army General Hospital, Department of Geriatric Cardiology<br>Luo, Leiming; Chinese People's Liberation Army General Hospital, Department of Geriatric Cardiology<br>zhao, Xiaoqian; 305 hospital of PLA<br>Ye, Ping; Military General Hospital of Beijing PLA, Geriatric Cardiology |
| <b>Primary Subject Heading</b>: | Cardiovascular medicine                                                                                                                                                                                                                                                                                                       |
| Secondary Subject Heading:      | Cardiovascular medicine, Geriatric medicine                                                                                                                                                                                                                                                                                   |
| Keywords:                       | Nutritional status, CONUT, Hypertension < CARDIOLOGY, All-cause mortality                                                                                                                                                                                                                                                     |
|                                 |                                                                                                                                                                                                                                                                                                                               |

SCHOLARONE™  
Manuscripts

**Title page****Controlling Nutritional Status (CONUT) score as an  
effective predictor of all-cause mortality in elderly  
hypertensive patients**

Xiaonan Sun<sup>1</sup>, Leiming Luo<sup>1</sup>, Xiaoqian Zhao<sup>2</sup>, Ping Ye<sup>1</sup>

1 Department of Geriatric Cardiology, Chinese People's Liberation Army General Hospital, Beijing, China, 100853;

2 Department of Cardiology, Chinese People's Liberation Army 305 Hospital, Beijing, China, 100000

\*Correspondence: Leiming Luo

Department of Geriatric Cardiology, Chinese People's Liberation Army General Hospital, 28 Fuxing Road, Beijing 100853, People's Republic of China

Tel: +86 10 8862 6362

Fax: +86 10 6687 6349

E-mail: lleim@sina.com

**Running title: CONUT is good predictor of all-cause mortality in hypertension**

**Conflict of Interest:** The authors declare no conflict of interest.

**Abstract**

**Objectives:** The aim of this study was to elucidate the impact of nutritional status on survival per Controlling Nutritional Status (CONUT) score and geriatric nutritional risk index (GNRI) in hypertension patients over 80 years of age.

**Design:** Prospective follow-up study.

**Participants:** A total of 336 hypertensive patients over 80 years old (80 y) were included to this study.

**Outcome measures:** All-cause death were recorded as Kaplan-Meier curves to evaluate the association between CONUT and all-cause mortality at follow-up. Cox regression models were used to investigate the prognostic value of CONUT and GNRI for all-cause mortality in the 90 day period after admission.

**Results:** Hypertensive patients with higher CONUT scores exhibited higher mortality within 90 days after admission (1.49%, 6.74%, 15.38% respectively,  $\chi^2 = 30.92$ ,  $P=0.000$ ). Surviving patients had higher BMI ( $24.25 \pm 3.05$  vs  $24.25 \pm 3.05$ ,  $p=0.012$ ), Hemoglobin ( $123.78 \pm 17.05$  vs  $115.07 \pm 20.42$ ,  $P=0.040$ ), and albumin levels, as well as lower FBS ( $6.90 \pm 2.48$  vs  $8.24 \pm 3.51$ ,  $p=0.010$ ). Higher GRNI score ( $99.42 \pm 6.55$  vs  $95.69 \pm 7.77$ ,  $p=0.002$ ) and lower CONUT ( $3.13 \pm 1.98$  vs  $5.14 \pm 2.32$ ) both indicated better nutritional status. Kaplan-Meier curves indicated that survival rates were significantly worse in the high CONUT group compared to the low CONUT group ( $\chi^2 = 13.372$ ,  $p=0.001$ ). Cox regression indicated an increase in hazard ratio (HR) with increasing CONUT risk (from normal to moderate to severe). HRs (95%CI) for three-month mortality were 1.458 (1.113-1.909). In both RTI patients and the “other reason” group, only CONUT was a sufficiently accurate predictor for all-cause mortality (HR=1.242, 95% confidence interval 1.062–1.452,  $P = 0.007$ ) in hypertensive patients over 80 y.

**Conclusion:** Nutritional status assessed via CONUT, as opposed to other nutrition indexes, is an accurate predictor of all-cause mortality 90 days post-admission. Evaluation of nutritional status may provide additional prognostic information in patients with hypertension, and the management of nutritional status is of great significance in reducing patient mortality.

## Key words

Nutritional status; CONUT; Hypertension; All-cause mortality

## Strengths of this study

Nutritional status assessed using the CONUT in hypertensive patients aged over 80 y efficiently predict all-cause mortality within 90 d post-admission.

Increased CONUT score relates to increase in all-cause mortality in patients admitted for RTI and other reasons.

## Study limitations

1) This study was a single-center study that included a relatively small number of patients.

2) Follow-up studies were performed for only 90 d.

## Funding

There is no funding to report for this submission.

## INTRODUCTION

The nutritional status of patients has drawn increased attention in a variety of clinical settings. There is a wealth of evidence to suggest that nutritional and immunologic status upon admission is closely associated with the outcome of patients with cardiovascular disease<sup>[1-3]</sup>. For elderly patients, the role of nutritional status is all the more important. Studies have shown that elderly patients with high nutritional risks are more likely to stay longer in the hospital than those without such risks<sup>[4]</sup>. Nutritional risk has also been identified as an independent predictor of functional status and mortality among institutionalized elderly patients<sup>[5]</sup>.

1  
2  
3  
4  
5  
6  
7  
8  
9  
10  
11  
12  
13  
14  
15  
16  
17  
18  
19  
20  
21  
22  
23  
24  
25  
26  
27  
28  
29  
30  
31  
32  
33  
34  
35  
36  
37  
38  
39  
40  
41  
42  
43  
44  
45  
46  
47  
48  
49  
50  
51  
52  
53  
54  
55  
56  
57  
58  
59  
60

Body mass index (BMI), serum albumin level, and pre albumin levels are the most commonly indexes used for evaluating nutritional status clinically. However, these single indexes exhibit limited clinical applications. Researchers have established improved nutritional indexes with an increasing number of complex nutritional indicators. The Geriatric Nutritional Risk Index (GNRI) is one of the most commonly used nutritional indicators in the elderly patient population<sup>[6]</sup>. The Controlling Nutritional Status (CONUT) score, which is calculated based on the serum albumin concentration, total peripheral lymphocyte count, and total cholesterol concentration, was developed as a screening tool for early detection of poor nutritional status<sup>[7]</sup>. Both indexes provide useful information for evaluating nutritional status comprehensively, and are currently widely applied in the evaluation of patients with tumors<sup>[8]</sup> that are undergoing dialysis<sup>[9]</sup>. These tools exhibit limited application in cardiovascular disease, however.

Hypertension, the most commonly occurring diseases in the elderly population, is associated with a number of comorbidities. When elderly patients are hospitalized due to infection or other reasons, the effects of nutritional status on their prognosis of merits further evaluation. The applicability of indexes such as GNRI or CONUT scores in assessing such patients has yet to be fully validated. The primary goal of this study was to elucidate the effect of nutritional status on survival in patients with hypertension and aged over 80 y.

## METHODS

### Patients

1  
2  
3  
4 This study included patients with hypertension who were diagnosed using the  
5  
6 criteria listed in Chinese Hypertension Prevention Guide (2010)<sup>[10]</sup>, hospitalized from  
7  
8 January 2011 to December 2013, and aged >80 y. The study was conducted at the  
9  
10 People's Liberation Army General Hospital under the full ethical approval of the  
11  
12 Human Investigation Committee. Informed consent was obtained from each patient  
13  
14 prior to their participation.  
15  
16  
17  
18

### 19 **General information and medical history**

20  
21 General information, including age, sex, lifestyle (smoking and drinking) and  
22  
23 basic medical history were collected. Patients were selected based on height, weight,  
24  
25 resting heart rate, systolic blood pressure, and diastolic blood pressure.  
26  
27  
28

### 29 **Nutritional metabolism and related biochemical indexes**

30  
31 Upon admission routine blood tests was conducted for all enrolled patients in the  
32  
33 Central Laboratory of our hospital. Detection indexes included white blood cells,  
34  
35 lymphocytes, platelets, hemoglobin (Hgb), serum creatinine (sCr), albumin (Alb),  
36  
37 total cholesterol (TC), triglyceride (TG), low-density lipoprotein cholesterol (LDL-C),  
38  
39 high-density lipoprotein cholesterol (HDL-C), fasting blood glucose (FBS), blood  
40  
41 urea nitrogen (BUN), uric acid (UA), pre albumin (PA), and electrolyte index.  
42  
43  
44  
45

46  
47 The nutritional status of each patient was also evaluated using two composite  
48  
49 indexes: CONUT score and GNRI. The CONUT score was determined in accordance  
50  
51 with the tool described in Table 1, which was first used by Ulibarri<sup>[7]</sup>. The GNRI,  
52  
53 which includes two nutritional indicators (albumin and actual weight compared to  
54  
55 ideal body weight), was developed by modifying the nutritional risk index for elderly  
56  
57  
58  
59  
60

1  
2  
3 patients.  $GNRI = [1.487 * \text{serum albumin (g/L)}] t[41.7 * \text{present/usual weight (kg)}]^{[6]}$ .

### 6 **Follow-up**

7  
8 A follow-up on all selected subjects was conducted throughout a 90-d  
9  
10 post-admission period. Follow-up times were set to occur 7, 14, 30, and 90 d after  
11  
12 admission and were conducted by interviewing each patient via telephone and by  
13  
14 reviewing his or her medical records. All-cause mortality was determined at the end of  
15  
16 the follow-up period. Death was ascertained from the death record, i.e., a legal  
17  
18 document including time, site, and other necessary information.  
19  
20  
21  
22

### 23 **Statistical analysis**

24  
25 All calculations were performed in SPSS ver. 22.0. For continuous quantitative  
26  
27 data, the K-S normality test was first applied to analyze whether the normal  
28  
29 distribution of quantitative data could be analyzed by an independent-sample t-test.  
30  
31 Data that were not normally distributed were analyzed via Mann-Whitney U test. A  
32  
33 Pearson's chi-squared ( $\chi^2$ ) test was run to analyze the categorical variables. Survival  
34  
35 curves were generated via Kaplan-Meier method, and multivariate analysis using a  
36  
37 Cox proportional hazards model was used for independent tests of significance.  
38  
39 Two-tailed P values  $<0.05$  were considered significant.  
40  
41  
42  
43  
44

## 45 **RESULTS**

### 46 **Clinical characteristics**

47  
48 A total of 336 hypertensive patients were enrolled, including 323 males and 13  
49  
50 females, with an average age of  $87.39 \pm 5.23$  years. All patients were diagnosed with  
51  
52 hypertension ranging from 5-27 years and had received antihypertensive drug  
53  
54 treatment. All patients had a history of CAD; 83 patients had a history of myocardial  
55  
56  
57  
58  
59  
60

1  
2  
3  
4 infarction, 29 patients had received stent therapy, 67 suffered from chronic heart  
5  
6 failure, 167 had T2DM, and 124 had anemia. Of these cases, 192 were admitted for  
7  
8 respiratory tract infection (RTI) and the remaining 144 patients were admitted for  
9  
10 non-infective factors, such as angina pectoris or uncontrolled blood pressure, among  
11  
12 others.  
13

14  
15  
16 The CONUT scores of the selected patients were determined and analysis was  
17  
18 conducted as presented in Table 2. Only five patients scored over 9, which indicates  
19  
20 severe malnutrition. We combined their data with those exhibiting moderate  
21  
22 malnutrition for analysis. Heart rate and blood glucose levels were higher in patients  
23  
24 with high CONUT scores than in those with low CONUT scores. The proportion of  
25  
26 patients with poor nutritional status due to admission caused by RTI was significantly  
27  
28 high, as well ( $\chi^2=70.835$ ,  $p=0.000$ ).  
29  
30  
31  
32

33  
34 Table 3 compares the nutritional index of patients with different reasons for  
35  
36 admission. Patients with RTI showed generally low nutritional status, including low  
37  
38 BMI, albumin level, GNRI score, high FBS, and CONUT score upon admission.  
39

#### 40 41 **Follow-up results**

42  
43  
44 A total of 27 deaths were recorded in the 90-d follow-up; most of these deaths  
45  
46 occurred between 30 to 90 d ( $n=17$ , 62.97%) post-admission. The parameters and  
47  
48 characteristics of different outcomes for the patients are presented in Table 4. No  
49  
50 differences in age, sex, or combination of diseases were found between different  
51  
52 outcomes. Likewise, no differences in systolic blood pressure were found. The  
53  
54 surviving patients, however, showed increased BMI ( $24.25\pm 3.05$  vs.  $24.25\pm 3.05$ ,  
55  
56  
57  
58  
59  
60



1  
2  
3  
4 p=0.012), hemoglobin (123.78±17.05 vs. 115.07±20.42, P=0.040), and albumin level,  
5  
6 as well as reduced DBP (62.48±9.60 vs. 68.31±12.02, p=0.016) and FBS (6.90±2.48  
7  
8 vs. 8.24±3.51, p=0.010). No significant difference in plasma pre albumin level  
9  
10 between different outcomes was indicated (19.21±8.70 vs. 16.25±11.68, p=0.200).

11  
12  
13 Surviving patients had improved GRNI scores (99.42±6.55 vs. 95.69±7.77,  
14  
15 p=0.002) and reduced CONUT scores (3.13±1.98 vs. 5.14±2.32) in the follow-up  
16  
17 period, both of which indicated improved nutritional status. We found that along with  
18  
19 increase in CONUT score, which suggests worse malnutrition, the incidence of  
20  
21 all-cause mortality increased. This tendency was not observed in the GRNI group,  
22  
23 however, as illustrated in Fig. 1.  
24  
25  
26  
27

### 28 29 **Survival analysis according to CONUT and GNRI**

30  
31 Survival curves based on different nutritional evaluations were plotted as shown  
32  
33 in Fig. 2. The survival rates were significantly lower in the high-CONUT group than  
34  
35 in the low-CONUT group ( $\chi^2=13.372$ , p=0.001). The survival curves based on the  
36  
37 GNRI are shown in Fig. 3. Differences among groups could not be determined ( $\chi^2$   
38  
39 =7.694, p=0.053).  
40  
41  
42  
43

### 44 45 **Prognostic values of CONUT and GNRI**

46  
47 Multivariate Cox regression analyses were conducted to investigate the possible  
48  
49 predictors of all-cause mortality in the study population (Table 5). By regression, both  
50  
51 RTI and CONUT were independent predictors of three-month all-cause mortality.  
52  
53 Increasing hazard ratios (HR) were observed with increasing CONUT risk (from  
54  
55 normal to moderate to severe). The HRs (95% CI) for the 90-d mortality were 1.458  
56  
57  
58  
59  
60

1  
2  
3  
4 (1.113–1.909). No significant correlation was indicated between the Alb level and  
5  
6 all-cause mortality in these patients (HR=1.019, 95% confidence interval 0.774-1.810,  
7  
8 P = 0.436); similar phenomena were observed in GNRI participants (HR=0.950, 95%  
9  
10 confidence interval 0.780-1.256, P = 0.717).  
11  
12

13  
14 Given that RTI is an independent risk factor for all-cause mortality, we further  
15  
16 conducted Cox regression according to different reasons for admission as shown in  
17  
18 Table 6. In the non-infection group, Alb, Hgb, GNRI, and CONUT independently  
19  
20 predicted all-cause mortality in the patients. However, in the RTI group, only CONUT  
21  
22 was identified as an accurate predictor of all-cause mortality (HR=1.242, 95%  
23  
24 confidence interval 1.062-1.452, P = 0.007).  
25  
26  
27

## 28 DISCUSSION

29  
30  
31 The findings in this study indicated that nutritional status is associated with 90-d  
32  
33 all-cause mortality in hypertension patients aged > 80 y. A CONUT score that was  
34  
35 higher on admission was an independent predictor for all-cause mortality (HR=1.458,  
36  
37 95% confidence interval 1.113–1.909, P = 0.006). As CONUT score increased, the  
38  
39 incidence of all-cause mortality likewise increased in patients admitted for both RTI  
40  
41 (HR=1.242, 95% confidence interval 1.062–1.452, P = 0.007) and other reasons  
42  
43 (HR=2.440, 95% confidence interval 1.140–5.220, P = 0.021).  
44  
45  
46  
47

48  
49 The relationship between nutritional status, particularly malnutrition, and  
50  
51 prognosis of patients with cardiovascular disease has garnered increasing research  
52  
53 interest<sup>[11]</sup>. In a study including 2,251 patients with a mean age of 65.0±12.8 y,  
54  
55 multiple logistic regression analysis indicated that malnutrition is an independent  
56  
57  
58  
59  
60

1  
2  
3 factor influencing post-MI complications<sup>[12]</sup>. Another Chinese study confirmed that  
4 nutritional status is independently associated with the risk of all-cause mortality in  
5  
6 geriatric patients with CAD. Whether nutritional support in these types of patients  
7  
8 improves clinical outcomes merits further investigation<sup>[13]</sup>. A study involving subjects  
9  
10 with heart failure indicated that poor nutritional status, as assessed via CONUT score,  
11  
12 and atherosclerosis, as indicated via CIMT, is significantly associated with  
13  
14 inflammation and predicts poor outcomes in CHF patients<sup>[14]</sup>. A relationship between  
15  
16 nutritional status and prognosis in patients with hypertension is rarely observed; for  
17  
18 elderly patients, such a relationship occurs even more rarely.  
19  
20  
21  
22  
23  
24

25  
26 CONUT is calculated using laboratory data including albumin concentration,  
27  
28 lymphocyte count, and cholesterol level. This index can accurately reflect the  
29  
30 nutritional status and immune function of the body. Previous reports on prognosis  
31  
32 evaluation and CONUT have mostly focused on tumor or liver diseases. Yoshida<sup>[15]</sup>,  
33  
34 for example, found that a moderate or severe CONUT score is an independent risk  
35  
36 factor for any morbidity and severe morbidities for esophageal cancer. The same  
37  
38 research team also concluded that CONUT is a convenient and useful tool for  
39  
40 nutritional status assessment prior to esophagectomy. Similar conclusions were drawn  
41  
42 for patients with nasopharyngeal carcinoma<sup>[16]</sup>. Studies on cardiovascular disease  
43  
44 have been rare in this regard, however.  
45  
46  
47  
48  
49  
50

51  
52 A study on STEMI patients showed that the CONUT score is associated with an  
53  
54 increased risk of all-cause mortality for both unadjusted as well as age- and  
55  
56 sex-adjusted models; in a full-adjusted model, the best predictors were age and  
57  
58  
59  
60

1  
2  
3  
4 BNP<sup>[17]</sup>. In patients with chronic heart failure, a mean follow-up period of 28.4  
5  
6 months revealed that patients experiencing cardiovascular events had impaired  
7  
8 nutritional status, higher CONUT scores, lower PNI scores, and lower GNRI scores  
9  
10 compared to patients who did not experience cardiovascular events<sup>[18]</sup>. In this study,  
11  
12 we found that only CONUT, not GNRI, is an accurate predictor for all-cause mortality  
13  
14 in hypertension patients up to three months after admission.  
15  
16

17  
18 A study involving patients admitted to an acute geriatric unit showed that both  
19  
20 albumin and CONUT are accurate predictors of short- and medium-term mortality;  
21  
22 however, the study added little to the information provided by albumin alone<sup>[19]</sup>. Our  
23  
24 results indicate that for hypertensive patients admitted for other reasons, albumin and  
25  
26 CONUT are independent predictors of all-cause mortality; for hypertensive patients  
27  
28 suffering from RTI, however, only CONUT provided useful prognostic information.  
29  
30 We therefore conclude that for patients admitted with hypertension, CONUT is a  
31  
32 valuable nutritional status index.  
33  
34  
35  
36  
37  
38

39  
40 GNRI, which is determined based on the albumin level and weight of the patient,  
41  
42 is a relatively new index for the nutritional assessment for elderly patients<sup>[5 20]</sup>. Past  
43  
44 studies have shown that a higher-risk GNRI is positively correlated with length of  
45  
46 hospital stay though the association between higher-risk GNRI and in-hospital  
47  
48 mortality is not significant<sup>[21]</sup>. GNRI is the most widely used tool in chronic kidney  
49  
50 disease with or without dialysis<sup>[9 22 23]</sup>. Multivariate Cox proportional hazards analysis  
51  
52 demonstrated that GNRI <100, serum ferritin  $\geq$  500  $\mu$ g/L, and age  $\geq$ 65 y are  
53  
54 significant predictors for mortality in hemodialysis patients<sup>[24]</sup>. Increased GNRI is  
55  
56  
57  
58  
59  
60

1  
2  
3  
4 also associated with increased CRP levels and low lymphocyte counts after  
5  
6 multivariable adjustment. Some studies have also reported on GNRI as a prognostic  
7  
8 factor in cardiovascular diseases<sup>[25 26]</sup>. In this study, however, we found that GNRI is  
9  
10 not an independent predictor for all-cause mortality in patients with hypertension.  
11  
12

13  
14 The present study was not without limitations. First, it was a single-center study  
15  
16 that included a relatively small number of patients. Follow-up studies were only  
17  
18 performed for only 90 d; a lengthier follow-up study is currently being conducted to  
19  
20 further explore the results reported here.  
21  
22

## 23 24 **CONCLUSION**

25  
26 We found that nutritional status assessed using CONUT and not by other  
27  
28 nutritional index in patients with hypertension admitted to the hospital can efficiently  
29  
30 predict all-cause mortality within 90 d post-admission. Increase in CONUT score,  
31  
32 which indicates malnutrition, was related to an increase in the incidence of all-cause  
33  
34 mortality in patients admitted for RTI (HR=1.242, 95% confidence  
35  
36 interval 1.062-1.452, P = 0.007) and other reasons (HR=2.440, 95% confidence  
37  
38 interval 1.140-5.220, P = 0.021). An accurate evaluation of nutritional status may  
39  
40 provide additional prognostic information for patients with hypertension, and  
41  
42 management of nutritional status may significantly improve treatment outcomes. In  
43  
44 the future, longer-term studies on larger numbers of patients are warranted to further  
45  
46 verify the results presented here.  
47  
48  
49  
50  
51  
52

## 53 54 **Acknowledgements**

55  
56 The authors would like to sincerely thank Professor Xue Changyong for his  
57  
58  
59  
60

instructive advice and useful suggestions on this thesis.

### Contributors

SXN, LLM, and YP contributed to the design of the review. SXN and ZXQ acquired the data. SXN and LLM contributed to the analysis. SXN wrote the draft. SXN, LLM, ZXQ, and YP critically revised the intellectual content of this work.

### Funding

This study was funded by a grant from the Chinese PLA Health Project (Project ID:12BJZ34).

### Conflicts of interest

The authors declare no conflict of interest.

### Data sharing statement

No additional data are available.

Table 1. Screening Tool for Controlling Nutritional Status or CONUT

Table 1. Screening Tool for Controlling Nutritional Status or CONUT

| Parameter                  | Requirements              | Score       |
|----------------------------|---------------------------|-------------|
| Albumin(g/l)               | $\geq 35$                 | 0           |
|                            | 30-34                     | 2           |
|                            | 25-29                     | 4           |
|                            | $< 25$                    | 6           |
| Total lymphocytocount(/ml) | $\geq 1600$               | 0           |
|                            | 1200-1599                 | 1           |
|                            | 800-1199                  | 2           |
|                            | $< 800$                   | 3           |
|                            | Total cholesterol(mmol/l) | $\geq 4.65$ |
| 3.62-4.64                  |                           | 1           |
| 2.58-3.61                  |                           | 2           |
| $< 2.58$                   |                           | 3           |

Dysnutritional states: Normal 0-1;Mild 2-4;Moderate 5-8;Severe 9-12

Table 2. Characteristics of study population and nutritional parameters based on nutritional status

Table 2 Characteristics of the study population and nutritional parameters based on nutritional status

|                                            | Normal<br>(CONUT=0-1,n=67) | Mild<br>malnutrition<br>(CONUT<br>2-4,n=178) | Moderate-severe<br>malnutrition<br>(CONUT<br>≥5,n=91) | P     |
|--------------------------------------------|----------------------------|----------------------------------------------|-------------------------------------------------------|-------|
| Age(year, $\bar{x} \pm s$ )                | 87.24±4.75                 | 87.18±4.95                                   | 87.75±5.56                                            | 0.638 |
| Male(n,%)                                  | 64 (95.52)                 | 169 (94.54)                                  | 90(98.90)                                             | 0.270 |
| Smoking history(n,%)                       | 19(28.36)                  | 60(33.71)                                    | 44(48.35)                                             | 0.018 |
| Anemia(n,%)                                | 20(29.85)                  | 63(35.39)                                    | 41(45.05)                                             | 0.129 |
| DM(n,%)                                    | 37(55.22)                  | 93(52.24)                                    | 34(37.36)                                             | 0.035 |
| Admission for RTI(n,%)                     | 18(26.86)                  | 91 (51.12)                                   | 83(91.21)                                             | 0.000 |
| SBP (mmHg, $\bar{x} \pm s$ )               | 129.49±15.11               | 133.96±18.88                                 | 134.04±19.92                                          | 0.236 |
| DBP (mmHg, $\bar{x} \pm s$ )               | 67.85±9.40                 | 67.71±13.03                                  | 68.50±11.03                                           | 0.953 |
| HR (beat/min, $\bar{x} \pm s$ )            | 70.97±12.94                | 73.22±14.61                                  | 82.20±17.46                                           | 0.000 |
| BMI (kg/m <sup>2</sup> , $\bar{x} \pm s$ ) | 25.08±3.10                 | 24.15±3.09                                   | 23.03±2.73                                            | 0.010 |
| Hgb(g/l, $\bar{x} \pm s$ )                 | 125.06±17.23               | 123.01±16.81                                 | 122.64±18.76                                          | 0.475 |
| TC(mmol/l, $\bar{x} \pm s$ )               | 4.53±0.08                  | 2.77±1.60                                    | 0.93±1.51                                             | 0.000 |
| TG(mmol/l, $\bar{x} \pm s$ )               | 1.85±1.28                  | 1.15±1.02                                    | 0.54±0.27                                             | 0.000 |
| LDL-C(mmol/l, $\bar{x} \pm s$ )            | 2.63±0.61                  | 1.76±0.72                                    | 1.53±0.71                                             | 0.000 |
| HDL-C(mmol/l, $\bar{x} \pm s$ )            | 1.16±0.36                  | 1.03±0.46                                    | 1.03±0.48                                             | 0.104 |
| Scr(mmol/l, $\bar{x} \pm s$ )              | 106.66±44.72               | 109.24±53.41                                 | 110.03±59.36                                          | 0.941 |
| BUN(mmol/l, $\bar{x} \pm s$ )              | 8.18±3.95                  | 9.20±4.61                                    | 10.21±4.76                                            | 0.016 |
| UA(umol/l, $\bar{x} \pm s$ )               | 335.51±101.25              | 347.15±97.37                                 | 321.76±109.13                                         | 0.081 |
| TP(g/l, $\bar{x} \pm s$ )                  | 69.40±5.25                 | 68.75±6.36                                   | 65.90±7.56                                            | 0.000 |
| Albumin(g/l, $\bar{x} \pm s$ )             | 40.13±3.31                 | 39.49±3.50                                   | 35.83±4.73                                            | 0.000 |
| FBS(mmol/l, $\bar{x} \pm s$ )              | 6.26±2.41                  | 7.11±2.64                                    | 7.39±2.60                                             | 0.021 |
| Prealbumin(mg/dl, $\bar{x} \pm s$ )        | 10.76±12.88                | 17.02±12.05                                  | 19.15±7.25                                            | 0.000 |

Table 3. Characteristics of study population and nutritional parameters by different admission reasons

Table 3 Characteristics of the study population and nutritional parameters by different admission reasons

|                         | RTI<br>(n=192) | Other causes<br>(n=144) | Statistical<br>value | P     |
|-------------------------|----------------|-------------------------|----------------------|-------|
| Age(year)               | 87.56±5.29     | 87.25±5.11              | 0.292                | 0.589 |
| Male(n,%)               | 185(96.35%)    | 143(95.97%)             | 0.033                | 0.855 |
| Smoking<br>history(n,%) | 77(40.1%)      | 46(30.87%)              | 3.101                | 0.078 |
| DM(n,%)                 | 88(45.83%)     | 79(53.02%)              | 1.734                | 0.188 |
| Hyperlipidemia(n,%)     | 98(51.04%)     | 79(53.02%)              | 0.132                | 0.717 |
| BMI(kg/m <sup>2</sup> ) | 23.68±3.16     | 24.53±3.00              | 4.991                | 0.026 |
| TP(g/l)                 | 67.79±7.65     | 68.08±5.67              | 0.150                | 0.699 |
| Alb(g/l)                | 37.43±4.62     | 40.00±5.25              | 33.01                | 0.000 |
| Hemoglobin(g/l)         | 122.69±19.10   | 123.61±15.14            | 0.235                | 0.628 |
| Creatinine (umol/l)     | 109.40±56.54   | 108.73±48.46            | 0.013                | 0.909 |
| BUN(mmol/l)             | 9.92±5.10      | 8.53±3.84               | 7.670                | 0.006 |
| FBS(mmol/l)             | 7.63±2.75      | 6.19±2.14               | 27.98                | 0.000 |
| UA(mmol/l)              | 328.74±102.06  | 350.96±104.49           | 3.875                | 0.050 |
| Pre albumin(mg/dl)      | 18.73±8.89     | 13.58±13.65             | 17.645               | 0.000 |
| GRNI score              | 97.72±7.68     | 100.49±5.35             | 11.822               | 0.001 |
| CONUT score             | 4.19±2.08      | 2.09±1.34               | 112.593              | 0.000 |

Table 4. Comparison of characteristics of study population and laboratory parameters by different outcomes



Table 4 Comparison of the characteristics of the study population and laboratory parameters by different outcomes

|                          | Death for all cause<br>(n=27) | Survival<br>(n=314) | P     |
|--------------------------|-------------------------------|---------------------|-------|
| Age(year)                | 89.29±4.57                    | 87.26±5.25          | 0.052 |
| Male (n, %)              | 27(100)                       | 308(98.08)          | 0.281 |
| DM (n,%)                 | 15 (55.56)                    | 152 (48.41)         | 0.304 |
| Hyperlipidemia (n,%)     | 12 (44.44)                    | 165 (52.55)         | 0.431 |
| CKD (n,%)                | 9(33.33)                      | 88(28.02)           | 0.667 |
| Anemia (n,%)             | 13(48.15)                     | 112(35.67)          | 0.206 |
| SBP (mmHg)               | 133.29±18.43                  | 126.85±20.16        | 0.085 |
| DBP (mmHg)               | 68.31±12.02                   | 62.48±9.60          | 0.016 |
| BMI (kg/m <sup>2</sup> ) | 22.31±3.31                    | 24.25±3.05          | 0.012 |
| TP(g/l)                  | 67.85±9.59                    | 67.92±6.58          | 0.962 |
| Alb(g/l)                 | 36.37±5.00                    | 38.74±4.16          | 0.005 |
| Hemoglobin (g/l)         | 115.07±20.42                  | 123.78±17.05        | 0.040 |
| Creatinine (umol/l)      | 110.74±61.19                  | 108.97±52.44        | 0.868 |
| BUN(mmol/l)              | 10.86±4.64                    | 9.18±4.62           | 0.071 |
| FBS(mmol/l)              | 8.24±3.51                     | (6.90±2.48)         | 0.010 |
| UA(mmol/l)               | 312.00±82.94                  | 340.72±105.31       | 0.169 |
| Prealbumin(mg/dl)        | 19.21±8.70                    | 16.25±11.68         | 0.200 |
| COUNT score              | 5.14±2.32                     | 3.13±1.98           | 0.000 |
| GNRI                     | 95.69±7.77                    | 99.42±6.55          | 0.026 |

DM: diabetes mellitus; SBP:systolic blood pressure; DBP: diastolic blood pressure;  
BMI:body mass index; TP:total protein; Alb: albumin; BUN:blood urea nitrogen; UA:uric acid

Table 5. Multivariate Cox regression for all-cause mortality

Table 5 Multivariate Cox regression for all-cause mortality

|            | B      | Wald  | Sig   | HR    | 95%CI       |
|------------|--------|-------|-------|-------|-------------|
| RTI        | 0.971  | 4.808 | 0.028 | 2.641 | 1.109–6.29  |
| Age        | 0.093  | 2.92  | 0.087 | 1.097 | 0.980–1.220 |
| BMI        | -0.121 | 0.642 | 0.423 | 1.184 | 0.660–1.191 |
| Alb        | 0.109  | 0.606 | 0.436 | 1.019 | 0.774–1.810 |
| Prealbumin | -2.352 | 0.607 | 0.436 | 0.095 | 0.00–35.271 |
| GNRI       | -0.520 | 0.132 | 0.717 | 0.950 | 0.780–1.256 |
| CONUT      | 0.377  | 7.511 | 0.006 | 1.458 | 1.113–1.909 |

Table 6. Cox regression analysis of common nutritional evaluation index for possible predictors of all-cause mortality by reason of admission

Table 6. Cox regression analysis of common nutritional evaluation index for possible predictors of all-cause mortality by reason of admission

|            | Adjusted HR with 95% CI for RTI |             |      | Adjusted HR with 95% CI for other reasons |             |      |
|------------|---------------------------------|-------------|------|-------------------------------------------|-------------|------|
|            | HR                              | 95%CI       | P    | HR                                        | 95%CI       | P    |
| BMI        | 0.980                           | 0.958–1.003 | .084 | 0.629                                     | 0.354–1.107 | .114 |
| Alb        | 0.989                           | 0.904–1.082 | .810 | 0.649                                     | 0.439–0.958 | .030 |
| Hgb        | 0.982                           | 0.962–1.003 | .092 | 0.891                                     | 0.800–0.992 | .035 |
| Prealbumin | 1.013                           | 0.969–1.060 | .092 | 1.034                                     | 0.941–1.137 | .448 |
| GNRI       | 0.995                           | 0.929–1.066 | .897 | 0.692                                     | 0.500–0.957 | .026 |
| CONUT      | 1.242                           | 1.062–1.452 | .007 | 2.440                                     | 1.14–5.22   | .021 |

Figure 1. All-cause mortality among different nutritional statuses

Figure 2. Kaplan-Meier survival curves for CONUT

Figure 3. Kaplan-Meier survival curves for GNRI

## REFERENCES

- 1  
2  
3 1. Anaszewicz M, Budzynski J. Clinical significance of nutritional status in patients with atrial fibrillation:  
4 An overview of current evidence. *Journal of cardiology* 2016 doi:  
5 10.1016/j.jjcc.2016.06.014[published Online First: Epub Date] | .  
6
- 7 2. Arodiwe I, Chinawa J, Ujunwa F, et al. Nutritional status of congenital heart disease (CHD) patients:  
8 Burden and determinant of malnutrition at university of Nigeria teaching hospital Ituku -  
9 Ozalla, Enugu. *Pakistan journal of medical sciences* 2015;**31**(5):1140-5 doi:  
10 10.12669/pjms.315.6837[published Online First: Epub Date] | .  
11
- 12 3. Das UN. Nutritional factors in the prevention and management of coronary artery disease and heart  
13 failure. *Nutrition* 2015;**31**(2):283-91 doi: 10.1016/j.nut.2014.08.011[published Online First:  
14 Epub Date] | .  
15
- 16 4. Cereda E, Klersy C, Pedrolli C, et al. The Geriatric Nutritional Risk Index predicts hospital length of  
17 stay and in-hospital weight loss in elderly patients. *Clinical nutrition* 2015;**34**(1):74-8 doi:  
18 10.1016/j.clnu.2014.01.017[published Online First: Epub Date] | .  
19
- 20 5. Cereda E, Pedrolli C, Zagami A, et al. Nutritional risk, functional status and mortality in newly  
21 institutionalised elderly. *The British journal of nutrition* 2013;**110**(10):1903-9 doi:  
22 10.1017/S0007114513001062[published Online First: Epub Date] | .  
23
- 24 6. Cereda E, Pedrolli C. The use of the Geriatric Nutritional Risk Index (GNRI) as a simplified nutritional  
25 screening tool. *The American journal of clinical nutrition* 2008;**87**(6):1966-7; author reply 67  
26
- 27 7. Ignacio de Ulibarri J, Gonzalez-Madrone A, de Villar NG, et al. CONUT: a tool for controlling  
28 nutritional status. First validation in a hospital population. *Nutricion hospitalaria*  
29 2005;**20**(1):38-45  
30
- 31 8. Iseki Y, Shibutani M, Maeda K, et al. Impact of the Preoperative Controlling Nutritional Status  
32 (CONUT) Score on the Survival after Curative Surgery for Colorectal Cancer. *PloS one*  
33 2015;**10**(7):e0132488 doi: 10.1371/journal.pone.0132488[published Online First: Epub  
34 Date] | .  
35
- 36 9. Beberashvili I, Azar A, Sinuani I, et al. Geriatric nutritional risk index, muscle function, quality of life  
37 and clinical outcome in hemodialysis patients. *Clinical nutrition* 2016 doi:  
38 10.1016/j.clnu.2016.04.010[published Online First: Epub Date] | .  
39
- 40 10. Liu LS, Writing Group of Chinese Guidelines for the Management of H. [2010 Chinese guidelines for  
41 the management of hypertension]. *Zhonghua xin xue guan bing za zhi* 2011;**39**(7):579-615  
42
- 43 11. Luke JN, Schmidt DF, Ritte R, et al. Nutritional predictors of chronic disease in a Central Australian  
44 Aboriginal cohort: A multi-mixture modelling analysis. *Nutrition, metabolism, and*  
45 *cardiovascular diseases : NMCD* 2016;**26**(2):162-8 doi:  
46 10.1016/j.numecd.2015.11.009[published Online First: Epub Date] | .  
47
- 48 12. Yoo SH, Kook HY, Hong YJ, et al. Influence of undernutrition at admission on clinical outcomes in  
49 patients with acute myocardial infarction. *Journal of cardiology* 2016 doi:  
50 10.1016/j.jjcc.2016.05.009[published Online First: Epub Date] | .  
51
- 52 13. Huang BT, Peng Y, Liu W, et al. Nutritional State Predicts All-Cause Death Independent of  
53 Comorbidities in Geriatric Patients with Coronary Artery Disease. *The journal of nutrition,*  
54 *health & aging* 2016;**20**(2):199-204 doi: 10.1007/s12603-015-0572-2[published Online First:  
55 Epub Date] | .  
56
- 57 14. Nakagomi A, Kohashi K, Morisawa T, et al. Nutritional Status is Associated with Inflammation and  
58 Predicts a Poor Outcome in Patients with Chronic Heart Failure. *Journal of atherosclerosis and*  
59 *thrombosis* 2016;**23**(6):713-27 doi: 10.5551/jat.31526[published Online First: Epub Date] | .  
60

15. Yoshida N, Baba Y, Shigaki H, et al. Preoperative Nutritional Assessment by Controlling Nutritional Status (CONUT) is Useful to estimate Postoperative Morbidity After Esophagectomy for Esophageal Cancer. *World journal of surgery* 2016;**40**(8):1910-7 doi: 10.1007/s00268-016-3549-3[published Online First: Epub Date]].
16. Du X-J, Tang L-L, Mao Y-P, et al. Value of the prognostic nutritional index and weight loss in predicting metastasis and long-term mortality in nasopharyngeal carcinoma. *Journal of Translational Medicine* 2015;**13**(1) doi: 10.1186/s12967-015-0729-0[published Online First: Epub Date]].
17. Basta G, Chatzianagnostou K, Paradossi U, et al. The prognostic impact of objective nutritional indices in elderly patients with ST-elevation myocardial infarction undergoing primary coronary intervention. *International journal of cardiology* 2016;**221**:987-92 doi: 10.1016/j.ijcard.2016.07.039[published Online First: Epub Date]].
18. Narumi T, Arimoto T, Funayama A, et al. Prognostic importance of objective nutritional indexes in patients with chronic heart failure. *Journal of cardiology* 2013;**62**(5):307-13 doi: 10.1016/j.jcc.2013.05.007[published Online First: Epub Date]].
19. Cabre M, Ferreiro C, Arus M, et al. Evaluation of CONUT for Clinical Malnutrition Detection and Short-Term Prognostic Assessment in Hospitalized Elderly People. *The journal of nutrition, health & aging* 2015;**19**(7):729-33 doi: 10.1007/s12603-015-0536-6[published Online First: Epub Date]].
20. Cereda E, Pedrolli C, Zagami A, et al. Nutritional screening and mortality in newly institutionalised elderly: a comparison between the geriatric nutritional risk index and the mini nutritional assessment. *Clinical nutrition* 2011;**30**(6):793-8 doi: 10.1016/j.clnu.2011.04.006[published Online First: Epub Date]].
21. Gartner S, Kraft M, Kruger J, et al. Geriatric nutritional risk index correlates with length of hospital stay and inflammatory markers in older inpatients. *Clinical nutrition* 2016 doi: 10.1016/j.clnu.2016.06.019[published Online First: Epub Date]].
22. Formiga F, Ferrer A, Cruzado JM, et al. Geriatric assessment and chronic kidney disease in the oldest old: the Octabaix study. *European journal of internal medicine* 2012;**23**(6):534-8 doi: 10.1016/j.ejim.2012.03.009[published Online First: Epub Date]].
23. Beberashvili I, Erlich A, Azar A, et al. Longitudinal Study of Serum Uric Acid, Nutritional Status, and Mortality in Maintenance Hemodialysis Patients. *Clinical journal of the American Society of Nephrology : CJASN* 2016;**11**(6):1015-23 doi: 10.2215/CJN.10400915[published Online First: Epub Date]].
24. Edalat-Nejad M, Zameni F, Qlich-Khani M, et al. Geriatric nutritional risk index: a mortality predictor in hemodialysis patients. *Saudi journal of kidney diseases and transplantation : an official publication of the Saudi Center for Organ Transplantation, Saudi Arabia* 2015;**26**(2):302-8
25. Kaneko H, Suzuki S, Goto M, et al. Geriatric nutritional risk index in hospitalized heart failure patients. *International journal of cardiology* 2015;**181**:213-5 doi: 10.1016/j.ijcard.2014.11.167[published Online First: Epub Date]].
26. Maruyama K, Nakagawa N, Saito E, et al. Malnutrition, renal dysfunction and left ventricular hypertrophy synergistically increase the long-term incidence of cardiovascular events. *Hypertens Res* 2016;**39**(9):633-9 doi: 10.1038/hr.2016.47[published Online First: Epub Date]].

1  
2  
3  
4  
5  
6  
7  
8  
9  
10  
11  
12  
13  
14  
15  
16  
17  
18  
19  
20  
21  
22  
23  
24  
25  
26  
27  
28  
29  
30  
31  
32  
33  
34  
35  
36  
37  
38  
39  
40  
41  
42  
43  
44  
45  
46  
47  
48  
49  
50  
51  
52  
53  
54  
55  
56  
57  
58  
59  
60

For peer review only

1  
2  
3  
4  
5  
6  
7  
8  
9  
10  
11  
12  
13  
14  
15  
16  
17  
18  
19  
20  
21  
22  
23  
24  
25  
26  
27  
28  
29  
30  
31  
32  
33  
34  
35  
36  
37  
38  
39  
40  
41  
42  
43  
44  
45  
46  
47  
48  
49  
50  
51  
52  
53  
54  
55  
56  
57  
58  
59  
60

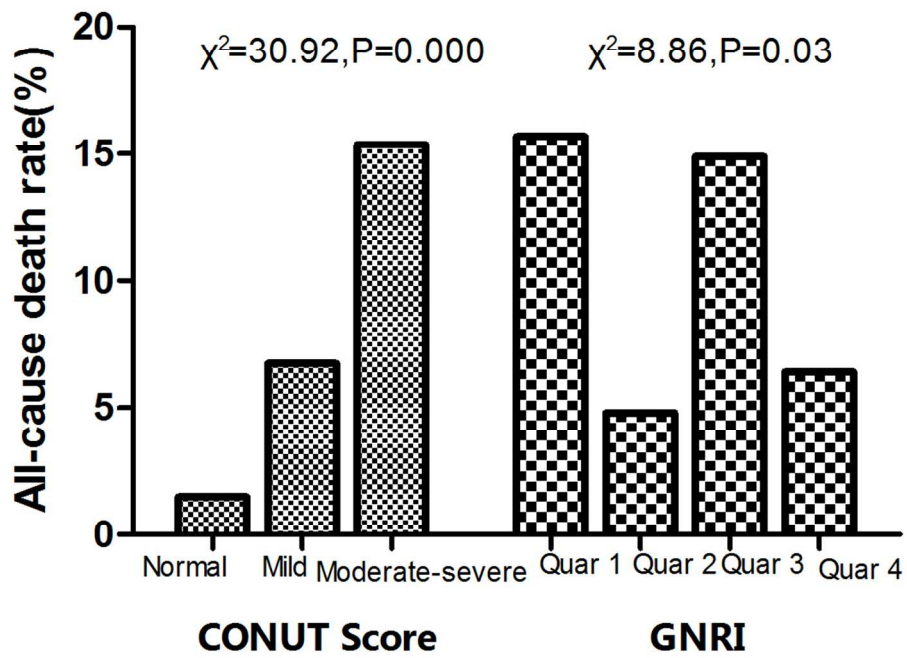

All-cause mortality in different nutritional status.

99x75mm (300 x 300 DPI)

ew only

1  
2  
3  
4  
5  
6  
7  
8  
9  
10  
11  
12  
13  
14  
15  
16  
17  
18  
19  
20  
21  
22  
23  
24  
25  
26  
27  
28  
29  
30  
31  
32  
33  
34  
35  
36  
37  
38  
39  
40  
41  
42  
43  
44  
45  
46  
47  
48  
49  
50  
51  
52  
53  
54  
55  
56  
57  
58  
59  
60

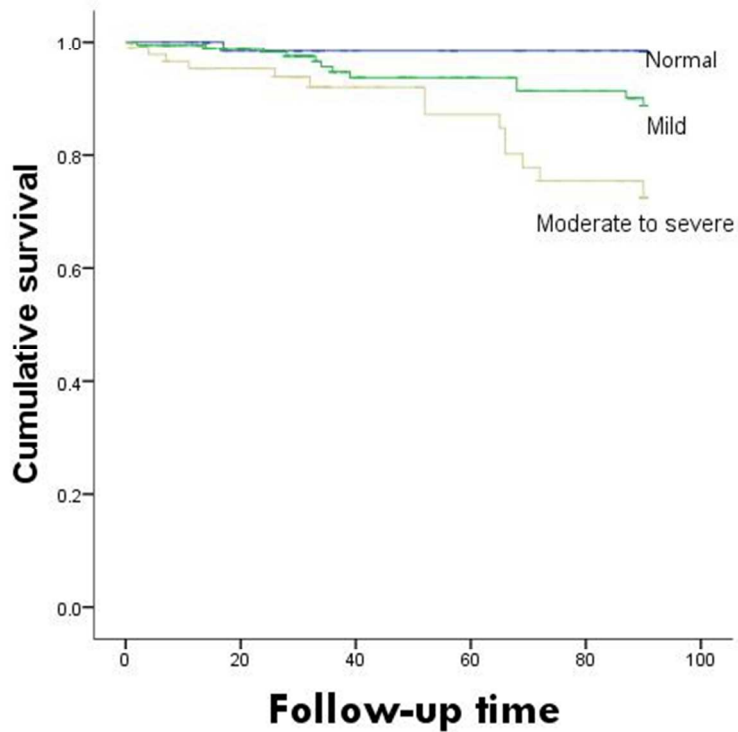

Kaplan-Meier survival curves for the CONUT

220x176mm (72 x 72 DPI)

For peer review only

1  
2  
3  
4  
5  
6  
7  
8  
9  
10  
11  
12  
13  
14  
15  
16  
17  
18  
19  
20  
21  
22  
23  
24  
25  
26  
27  
28  
29  
30  
31  
32  
33  
34  
35  
36  
37  
38  
39  
40  
41  
42  
43  
44  
45  
46  
47  
48  
49  
50  
51  
52  
53  
54  
55  
56  
57  
58  
59  
60

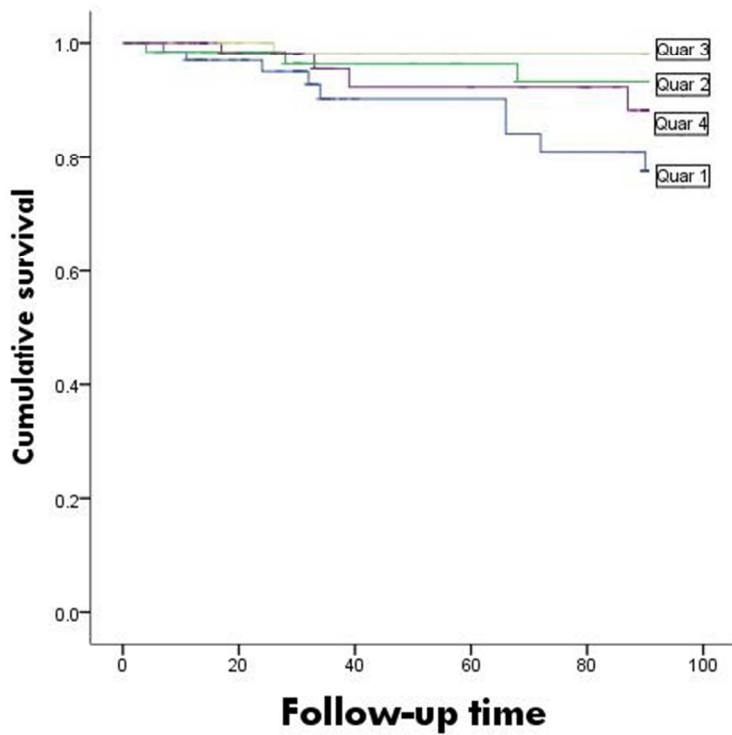

Kaplan-Meier survival curves for the GNRI

220x176mm (72 x 72 DPI)

For peer review only



# BMJ Open

## Controlling Nutritional Status (CONUT) score as a predictor of all-cause mortality in elderly hypertensive patients: a prospective follow-up study

|                                 |                                                                                                                                                                                                                                                                                                                               |
|---------------------------------|-------------------------------------------------------------------------------------------------------------------------------------------------------------------------------------------------------------------------------------------------------------------------------------------------------------------------------|
| Journal:                        | <i>BMJ Open</i>                                                                                                                                                                                                                                                                                                               |
| Manuscript ID                   | bmjopen-2016-015649.R2                                                                                                                                                                                                                                                                                                        |
| Article Type:                   | Research                                                                                                                                                                                                                                                                                                                      |
| Date Submitted by the Author:   | 01-Jun-2017                                                                                                                                                                                                                                                                                                                   |
| Complete List of Authors:       | Sun, Xiaonan; Chinese People's Liberation Army General Hospital, Department of Geriatric Cardiology<br>Luo, Leiming; Chinese People's Liberation Army General Hospital, Department of Geriatric Cardiology<br>zhao, Xiaoqian; 305 hospital of PLA<br>Ye, Ping; Military General Hospital of Beijing PLA, Geriatric Cardiology |
| <b>Primary Subject Heading</b>: | Cardiovascular medicine                                                                                                                                                                                                                                                                                                       |
| Secondary Subject Heading:      | Cardiovascular medicine, Geriatric medicine                                                                                                                                                                                                                                                                                   |
| Keywords:                       | Nutritional status, CONUT, Hypertension < CARDIOLOGY, All-cause mortality                                                                                                                                                                                                                                                     |
|                                 |                                                                                                                                                                                                                                                                                                                               |

SCHOLARONE™  
Manuscripts

## Title page

**Controlling Nutritional Status (CONUT) score as a predictor  
of all-cause mortality in elderly hypertensive patients: a  
prospective follow-up study**

Xiaonan Sun<sup>1</sup>, Leiming Luo<sup>1</sup>, Xiaoqian Zhao<sup>2</sup>, Ping Ye<sup>1</sup>

1 Department of Geriatric Cardiology, Chinese People's Liberation Army General Hospital, Beijing, China, 100853;

2 Department of Cardiology, Chinese People's Liberation Army 305 Hospital, Beijing, China, 100000

\*Correspondence: Leiming Luo

Department of Geriatric Cardiology, Chinese People's Liberation Army General Hospital, 28 Fuxing Road, Beijing 100853, People's Republic of China

Tel: +86 10 8862 6362

Fax: +86 10 6687 6349

E-mail: lleim@sina.com

**Running title: CONUT is good predictor of all-cause mortality in hypertension**

**Conflict of Interest:** The authors declare no conflict of interest.

**Abstract**

**Objectives:** The aim of this study was to elucidate the impact of nutritional status on survival per Controlling Nutritional Status (CONUT) score and geriatric nutritional risk index (GNRI) in hypertension patients over 80 years of age.

**Design:** Prospective follow-up study.

**Participants:** A total of 336 hypertensive patients over 80 years old (80 y) were included to this study.

**Outcome measures:** All-cause death were recorded as Kaplan-Meier curves to evaluate the association between CONUT and all-cause mortality at follow-up. Cox regression models were used to investigate the prognostic value of CONUT and GNRI for all-cause mortality in the 90 day period after admission.

**Results:** Hypertensive patients with higher CONUT scores exhibited higher mortality within 90 days after admission (1.49%, 6.74%, 15.38% respectively,  $\chi^2=30.92$ ,  $P=0.000$ ). Surviving patients had higher BMI ( $24.25\pm 3.05$  VS  $24.25\pm 3.05$ ,  $p=0.012$ ), Hemoglobin ( $123.78\pm 17.05$  VS  $115.07\pm 20.42$ ,  $P=0.040$ ) and albumin levels, as well as lower FBS ( $6.90\pm 2.48$  VS  $8.24\pm 3.51$ ,  $p=0.010$ ). Higher GRNI score ( $99.42\pm 6.55$  VS  $95.69\pm 7.77$ ,  $p=0.002$ ) and lower CONUT ( $3.13\pm 1.98$  VS  $5.14\pm 2.32$ ) both indicated better nutritional status. Kaplan-Meier curves indicated that survival rates were significantly worse in the high CONUT group compared to the low CONUT group ( $\chi^2=13.372$ ,  $p=0.001$ ). Cox regression indicated an increase in hazard ratio (HR) with increasing CONUT risk (from normal to moderate to severe). HRs (95%CI) for three-month mortality was 1.458 (1.102-1.911). In both RTI and “other reason” group, only CONUT was a sufficiently predictor for all-cause mortality (HR=1.284, 95%CI 1.013–1.740,  $P=0.020$  & HR=1.841, 95% CI 1.117–4.518,  $P=0.011$ ). ROC showed CONUT higher than 3.0 was found to predict all-cause mortality with a sensitivity of 77.8% and a specificity of 64.7% (AUC = 0.778,  $P<0.001$ ).

**Conclusion:** Nutritional status assessed via CONUT, is an accurate predictor of all-cause mortality 90 days post-admission. Evaluation of nutritional status may provide additional prognostic information in hypertensive patients.

## Key words

Nutritional status; CONUT; Hypertension; All-cause mortality

## Strengths of this study

- This was a study including 336 hypertensive patients over 80 years combined with diagnosed cardiovascular (CVD) disease.
- It is the first study to explore the relationship between the nutritional status based on CONUT or GNRI on admission and all-cause death in such very elderly hypertensive patients.

## Study limitations

1) This study was a single-center study that included a relatively small number of patients.

2) Follow-up studies were performed for only 90 day.

## Funding

There is no funding to report for this submission.

## INTRODUCTION

The nutritional status of patients has drawn increased attention in a variety of clinical settings. There is a wealth of evidence to suggest that nutritional and immunologic status upon admission is closely associated with the outcome of patients with cardiovascular disease<sup>[1-3]</sup>. For elderly patients, the role of nutritional status is all the more important. Studies have shown that elderly patients with high nutritional risks are more likely to stay longer in the hospital than those without such risks<sup>[4]</sup>. Nutritional risk has also been identified as an independent predictor of functional

1  
2  
3  
4 status and mortality among institutionalized elderly patients<sup>[5]</sup>.

5  
6 Body mass index (BMI), serum albumin level, and pre albumin levels are the  
7  
8 most commonly indexes used for evaluating nutritional status clinically. However,  
9  
10 these single indexes exhibit limited clinical applications. Researchers have established  
11  
12 improved nutritional indexes with an increasing number of complex nutritional  
13  
14 indicators. The Geriatric Nutritional Risk Index (GNRI) is one of the most commonly  
15  
16 used nutritional indicators in the elderly patient population<sup>[6]</sup>. The Controlling  
17  
18 Nutritional Status (CONUT) score, which is calculated based on the serum albumin  
19  
20 concentration, total peripheral lymphocyte count, and total cholesterol concentration,  
21  
22 was developed as a screening tool for early detection of poor nutritional status<sup>[7]</sup>. Both  
23  
24 indexes provide useful information for evaluating nutritional status comprehensively,  
25  
26 and are currently widely applied in the evaluation of patients with tumors<sup>[8]</sup> that are  
27  
28 undergoing dialysis<sup>[9]</sup>. These tools exhibit limited application in cardiovascular  
29  
30 disease, however.  
31  
32  
33  
34  
35  
36  
37  
38

39 Hypertension, the most commonly occurring diseases in the elderly population, is  
40  
41 associated with a number of comorbidities. When elderly patients are hospitalized due  
42  
43 to infection or other reasons, the effects of nutritional status on their prognosis of  
44  
45 merits further evaluation. The applicability of indexes such as GNRI or CONUT  
46  
47 scores in assessing such patients has yet to be fully validated. The primary goal of this  
48  
49 study was to elucidate the effect of nutritional status on survival in patients with  
50  
51 hypertension and aged over 80 years.  
52  
53  
54  
55

## 56 METHODS

## Study Design

This is a single center, prospective, randomized, control and observational trial. We design to consecutively enrolled hypertensive patients hospitalized in prescribed time and followed up to 90 days. The relationship between nutritional status and prognosis was analyzed.

## Patients

This study included patients with hypertension who were diagnosed using the criteria listed in Chinese Hypertension Prevention Guide (2010)<sup>[10]</sup>, hospitalized from January 2011 to December 2013, and aged >80 years. The study cohort comprised 336 Chinese hypertensive patients aged  $\geq 80$  years who were enrolled consecutively at the Department of Geriatric Cardiology. All the patients are veterans. The study was conducted at the People's Liberation Army General Hospital under the full ethical approval of the Human Investigation Committee. Informed consent was obtained from each patient prior to their participation. The Chinese People's Liberation Army General Hospital was their designated hospital and held their integrated long-term medical and final death records, which made it easier for us to follow them up effectively and judge endpoints accurately.

## Follow-up

A follow-up on all selected subjects was conducted throughout a 90-day post-admission period. Follow-up times were set to occur 7, 14, 30, and 90 day after admission and were conducted by interviewing each patient via telephone and by reviewing his or her medical records. All-cause mortality was determined at the end of

1  
2  
3  
4 the follow-up period. No patient dropped out during the study period. Follow-up data  
5  
6 was tracked directly and telephoned to interviews. Death was ascertained from the  
7  
8 death record, i.e., a legal document including time, site, and other necessary  
9  
10 information.

### 11 12 13 **General information and medical history**

14  
15  
16 General information, including age, sex, lifestyle (smoking and drinking) and  
17  
18 basic medical history were collected. Patients were selected based on height, weight,  
19  
20 resting heart rate, systolic blood pressure, and diastolic blood pressure.  
21  
22

### 23 **Nutritional metabolism and related biochemical indexes**

24  
25  
26 Upon admission routine blood tests was conducted for all enrolled patients in the  
27  
28 Central Laboratory of our hospital. Detection indexes included white blood cells,  
29  
30 lymphocytes, platelets, hemoglobin (Hgb), serum creatinine (sCr), albumin (Alb),  
31  
32 total cholesterol (TC), triglyceride (TG), low-density lipoprotein cholesterol (LDL-C),  
33  
34 high-density lipoprotein cholesterol (HDL-C), fasting blood glucose (FBS), blood  
35  
36 urea nitrogen (BUN), uric acid (UA), pre albumin (PA), and electrolyte index.  
37  
38

39  
40  
41 The nutritional status of each patient was also evaluated using two composite  
42  
43 indexes: CONUT score and GNRI. The CONUT score was determined in accordance  
44  
45 with the tool described in Table 1, which was first used by Ulibarri<sup>[7]</sup>. The GNRI,  
46  
47 which includes two nutritional indicators (albumin and actual weight compared to  
48  
49 ideal body weight), was developed by modifying the nutritional risk index for elderly  
50  
51 patients.  $GNRI = [1.487 * \text{serum albumin (g/L)}] \uparrow [41.7 * \text{present/usual weight (kg)}]^{[6]}$ .  
52  
53

### 54 **Statistical analysis**

55  
56  
57 All calculations were performed in SPSS ver. 22.0. For continuous quantitative  
58  
59

1  
2  
3  
4 data, the K-S normality test was first applied to analyze whether the normal  
5  
6 distribution of quantitative data could be analyzed by an independent-sample t-test.  
7  
8 Data that were not normally distributed were analyzed via Mann-Whitney U test. A  
9  
10 Pearson's chi-squared ( $\chi^2$ ) test was run to analyze the categorical variables. Survival  
11  
12 curves were generated via Kaplan-Meier method, and multivariate analysis using a  
13  
14 Cox proportional hazards model was used for independent tests of significance.  
15  
16 Two-tailed P values  $<0.05$  were considered significant.  
17  
18  
19

## 20 21 **RESULTS**

### 22 23 **Clinical characteristics**

24  
25 A total of 336 hypertensive patients were enrolled, including 323 males and 13  
26  
27 females, with an average age of  $87.39 \pm 5.23$  years. All patients were diagnosed with  
28  
29 hypertension ranging from 5-27 years and had received antihypertensive drug  
30  
31 treatment. All patients had a history of CAD; 83 patients had a history of myocardial  
32  
33 infarction, 29 patients had received stent therapy, 67 suffered from chronic heart  
34  
35 failure, 167 had T2DM, and 124 had anemia. Of these cases, 192 were admitted for  
36  
37 respiratory tract infection (RTI) and the remaining 144 patients were admitted for  
38  
39 non-infective factors, such as angina pectoris or uncontrolled blood pressure, among  
40  
41 others.  
42  
43  
44  
45  
46  
47

48  
49 The CONUT scores of the selected patients were determined and analysis was  
50  
51 conducted as presented in Table 2. Only five patients scored over 9, which indicates  
52  
53 severe malnutrition. We combined their data with those exhibiting moderate  
54  
55 malnutrition for analysis. Heart rate and blood glucose levels were higher in patients  
56  
57  
58  
59  
60



1  
2  
3  
4 with high CONUT scores than in those with low CONUT scores. The proportion of  
5  
6 patients with poor nutritional status due to admission caused by RTI was significantly  
7  
8 high, as well ( $\chi^2=70.835$ ,  $p=0.000$ ).

9  
10  
11 Table 3 compares the nutritional index of patients with different reasons for  
12  
13 admission. Patients with RTI showed generally low nutritional status, including low  
14  
15 BMI, albumin level, GNRI score, high FBS, and CONUT score upon admission.

### 16 17 18 **Follow-up results**

19  
20 A total of 27 deaths were recorded in the 90-day follow-up; most of these deaths  
21  
22 occurred between 30 to 90 day ( $n=17$ , 62.97%) post-admission. The parameters and  
23  
24 characteristics of different outcomes for the patients are presented in Table 4. No  
25  
26 differences in age, sex, or combination of diseases were found between different  
27  
28 outcomes. Likewise, no differences in systolic blood pressure were found. The  
29  
30 surviving patients, however, showed increased BMI ( $24.25\pm 3.05$  vs.  $24.25\pm 3.05$ ,  
31  
32  $p=0.012$ ), hemoglobin ( $123.78\pm 17.05$  vs.  $115.07\pm 20.42$ ,  $P=0.040$ ), and albumin level,  
33  
34 as well as reduced DBP ( $62.48\pm 9.60$  vs.  $68.31\pm 12.02$ ,  $p=0.016$ ) and FBS ( $6.90\pm 2.48$   
35  
36 vs.  $8.24\pm 3.51$ ,  $p=0.010$ ). No significant difference in plasma pre albumin level  
37  
38 between different outcomes was indicated ( $19.21\pm 8.70$  vs.  $16.25\pm 11.68$ ,  $p=0.200$ ).

39  
40  
41 Surviving patients had improved GRNI scores ( $99.42\pm 6.55$  vs.  $95.69\pm 7.77$ ,  
42  
43  $p=0.002$ ) and reduced CONUT scores ( $3.13\pm 1.98$  vs.  $5.14\pm 2.32$ ) in the follow-up  
44  
45 period, both of which indicated improved nutritional status. We found that along with  
46  
47 increase in CONUT score, which suggests worse malnutrition, the incidence of  
48  
49 all-cause mortality increased. This tendency was not observed in the GRNI group,  
50  
51  
52  
53  
54  
55  
56  
57  
58  
59  
60

1  
2  
3  
4 however, as illustrated in Fig. 1.

### 5 6 **Survival analysis according to CONUT and GNRI**

7  
8 Survival curves based on different nutritional evaluations were plotted as shown  
9  
10 in Fig. 2. The survival rates were significantly lower in the high-CONUT group than  
11  
12 in the low-CONUT group ( $\chi^2=13.372$ ,  $p=0.001$ ). The survival curves based on the  
13  
14 GNRI are shown in Fig. 3. Differences among groups could not be determined ( $\chi^2$   
15  
16  $=7.694$ ,  $p=0.053$ ).  
17  
18  
19

### 20 21 **Prognostic values of CONUT and GNRI**

22  
23 Multivariate Cox regression analyses were conducted to investigate the possible  
24  
25 predictors of all-cause mortality in the study population (Table 5). By regression, both  
26  
27 RTI and CONUT were independent predictors of three-month all-cause mortality.  
28  
29 Increasing hazard ratios (HR) were observed with increasing CONUT risk (from  
30  
31 normal to moderate to severe). The HRs (95% CI) for the 90-d mortality were 1.458  
32  
33 (95% confidence interval 1.102–1.911,  $P=0.015$ ). No significant correlation was  
34  
35 indicated between the GNRI participants (HR=1.038, 95% confidence interval  
36  
37 0.960-1.115,  $P = 0.313$ ).  
38  
39  
40  
41  
42

43  
44 Given that RTI is an independent risk factor for all-cause mortality, we further  
45  
46 conducted Cox regression according to different reasons for admission as shown in  
47  
48 Table 6. In the non-infection group, CONUT independently predicted all-cause  
49  
50 mortality in the patients. However, in the RTI group, except CONUT was identified as  
51  
52 an accurate predictor of all-cause mortality (HR=1.284, 95% confidence interval  
53  
54 1.013-1.740,  $P = 0.020$ ), age also was link to all-cause mortality(HR=1.139, 95%  
55  
56  
57  
58  
59  
60

1  
2  
3  
4 confidence interval 1.007-1.287, P=0.038).

5  
6 Regarding the ROC analysis, an admission CONUT higher than 3.0 was found to  
7  
8 predict all-cause mortality with a sensitivity of 77.8% and a specificity of 64.7%  
9  
10 (AUC = 0.778, P<0.001).  
11  
12

## 13 14 DISCUSSION

15  
16 The findings in this study indicated that nutritional status is associated with 90-d  
17  
18 all-cause mortality in hypertension patients aged > 80 years. A CONUT score that was  
19  
20 higher on admission was an independent predictor for all-cause mortality 1.458 (95%  
21  
22 confidence interval 1.102–1.911, P=0.015). As CONUT score increased, the incidence  
23  
24 of all-cause mortality likewise increased in patients admitted for both RTI (HR=1.284,  
25  
26 95% confidence interval 1.013-1.740, P = 0.020) and other reasons (HR=1.841, 95%  
27  
28 confidence interval 1.117–4.518, P = 0.011).  
29  
30  
31  
32

33  
34 The relationship between nutritional status, particularly malnutrition, and  
35  
36 prognosis of patients with cardiovascular disease has garnered increasing research  
37  
38 interest<sup>[11]</sup>. In a study including 2,251 patients with a mean age of 65.0±12.8 years,  
39  
40 multiple logistic regression analysis indicated that malnutrition is an independent  
41  
42 factor influencing post-MI complications<sup>[12]</sup>. Another Chinese study confirmed that  
43  
44 nutritional status is independently associated with the risk of all-cause mortality in  
45  
46 geriatric patients with CAD. Whether nutritional support in these types of patients  
47  
48 improves clinical outcomes merits further investigation<sup>[13]</sup>. A study involving subjects  
49  
50 with heart failure indicated that poor nutritional status, as assessed via CONUT score,  
51  
52 and atherosclerosis, as indicated via CIMT, is significantly associated with  
53  
54  
55  
56  
57  
58  
59  
60

1  
2  
3 inflammation and predicts poor outcomes in CHF patients<sup>[14]</sup>. A relationship between  
4  
5 nutritional status and prognosis in patients with hypertension is rarely observed; for  
6  
7 elderly patients, such a relationship occurs even more rarely.  
8  
9

10  
11 CONUT is calculated using laboratory data including albumin concentration,  
12  
13 lymphocyte count, and cholesterol level. This index can accurately reflect the  
14  
15 nutritional status and immune function of the body. Previous reports on prognosis  
16  
17 evaluation and CONUT have mostly focused on tumor or liver diseases. Yoshida<sup>[15]</sup>,  
18  
19 for example, found that a moderate or severe CONUT score is an independent risk  
20  
21 factor for any morbidity and severe morbidities for esophageal cancer. The same  
22  
23 research team also concluded that CONUT is a convenient and useful tool for  
24  
25 nutritional status assessment prior to esophagectomy. Similar conclusions were drawn  
26  
27 for patients with nasopharyngeal carcinoma<sup>[16]</sup>. Studies on cardiovascular disease  
28  
29 have been rare in this regard, however.  
30  
31  
32  
33  
34  
35

36  
37 A study on STEMI patients showed that the CONUT score is associated with an  
38  
39 increased risk of all-cause mortality for both unadjusted as well as age- and  
40  
41 sex-adjusted models; in a full-adjusted model, the best predictors were age and  
42  
43 BNP<sup>[17]</sup>. In patients with chronic heart failure, a mean follow-up period of 28.4  
44  
45 months revealed that patients experiencing cardiovascular events had impaired  
46  
47 nutritional status, higher CONUT scores, lower PNI scores, and lower GNRI scores  
48  
49 compared to patients who did not experience cardiovascular events<sup>[18]</sup>. In this study,  
50  
51 we found that only CONUT, not GNRI, is an accurate predictor for all-cause mortality  
52  
53  
54  
55  
56  
57  
58  
59  
60 in hypertension patients up to three months after admission.

1  
2  
3  
4 A study involving patients admitted to an acute geriatric unit showed that both  
5  
6 albumin and CONUT are accurate predictors of short- and medium-term mortality;  
7  
8 however, the study added little to the information provided by albumin alone<sup>[19]</sup>. Our  
9  
10 results indicate that for hypertensive patients admitted for other reasons, albumin and  
11  
12 CONUT are independent predictors of all-cause mortality; for hypertensive patients  
13  
14 suffering from RTI, however, only CONUT provided useful prognostic information.  
15  
16 We therefore conclude that for patients admitted with hypertension, CONUT is a  
17  
18 valuable nutritional status index.  
19  
20  
21  
22

23  
24 GNRI, which is determined based on the albumin level and weight of the patient,  
25  
26 is a relatively new index for the nutritional assessment for elderly patients<sup>[5 20]</sup>. Past  
27  
28 studies have shown that a higher-risk GNRI is positively correlated with length of  
29  
30 hospital stay though the association between higher-risk GNRI and in-hospital  
31  
32 mortality is not significant<sup>[21]</sup>. GNRI is the most widely used tool in chronic kidney  
33  
34 disease with or without dialysis<sup>[9 22 23]</sup>. Multivariate Cox proportional hazards analysis  
35  
36 demonstrated that GNRI <100, serum ferritin  $\geq 500$   $\mu\text{g/L}$ , and age  $\geq 65$  y are  
37  
38 significant predictors for mortality in hemodialysis patients<sup>[24]</sup>. Increased GNRI is  
39  
40 also associated with increased CRP levels and low lymphocyte counts after  
41  
42 multivariable adjustment. Some studies have also reported on GNRI as a prognostic  
43  
44 factor in cardiovascular diseases<sup>[25 26]</sup>. In this study, however, we found that GNRI is  
45  
46 not an independent predictor for all-cause mortality in patients with hypertension.  
47  
48  
49  
50  
51  
52

53  
54 The present study was not without limitations. First, it was a single-center study  
55  
56 that included a relatively small number of patients. Follow-up studies were only  
57  
58  
59  
60

1  
2  
3  
4 performed for only 90-day; a lengthier follow-up study is currently being conducted  
5  
6 to further explore the results reported here.  
7

## 8 9 **CONCLUSION**

10  
11 We found that nutritional status assessed using CONUT and not by other  
12  
13 nutritional index in hypertensive patients over 80-year can efficiently predict all-cause  
14  
15 mortality within 90 day post-admission. Increased CONUT score was related to an  
16  
17 increase in the incidence of all-cause mortality in patients admitted for RTI and other  
18  
19 reasons. An accurate evaluation of nutritional status may provide additional  
20  
21 prognostic information for such patients and management of nutritional status may  
22  
23 significantly improve treatment outcomes.  
24  
25  
26  
27

### 28 29 **Acknowledgement**

30  
31 The authors would like to sincerely thank Professor Xue Changyong for his  
32  
33 instructive advice and useful suggestions on this thesis.  
34  
35

### 36 37 **Contributors**

38  
39 Guarantor of overall study integrity: LLM. The design of the study: SXN, LLM, and  
40  
41 YP. Data collection and interpretation: SXN and ZXQ. Statistical analysis: SXN and  
42  
43 LLM. Manuscript preparation: SXN and LLM. Final approval of manuscript: SXN,  
44  
45 LLM, ZXQ, and YP.

### 46 47 **Data sharing statement**

48  
49 All data generated or analyzed during this study are included in this article and no  
50  
51 additional data are available.

### 52 53 **Ethics approval**

54  
55 Human Investigation Committee of the People's Liberation Army general hospital.  
56  
57  
58  
59  
60

## Funding

This study was funded by a grant from the Chinese PLA Health Project (Project ID:12BJZ34).

## Conflicts of interest

The authors declare no conflict of interest.

Table 1. Screening Tool for Controlling Nutritional Status or CONUT

Table 1. Screening Tool for Controlling Nutritional Status or CONUT

| Parameter                   | Requirements | Score |
|-----------------------------|--------------|-------|
| Albumin(g/l)                | $\geq 35$    | 0     |
|                             | 30-34        | 2     |
|                             | 25-29        | 4     |
|                             | $< 25$       | 6     |
| Total lymphocyte count(/ml) | $\geq 1600$  | 0     |
|                             | 1200-1599    | 1     |
|                             | 800-1199     | 2     |
|                             | $< 800$      | 3     |
| Total cholesterol(mmol/l)   | $\geq 4.65$  | 0     |
|                             | 3.62-4.64    | 1     |
|                             | 2.58-3.61    | 2     |
|                             | $< 2.58$     | 3     |

Dysnutritional states: Normal 0-1; Mild 2-4; Moderate 5-8; Severe 9-12

Table 2. Characteristics of study population and nutritional parameters based on nutritional status

Table 2 Characteristics of the study population and nutritional parameters based on nutritional status

|  | Normal<br>(CONUT=0-1,<br>n=67) | Mild<br>malnutrition<br>(CONUT 2-4,<br>n=178) | Moderate-<br>severe<br>malnutrition<br>(CONUT<br>$\geq 5$ ,n=91) | P |
|--|--------------------------------|-----------------------------------------------|------------------------------------------------------------------|---|
|  |                                |                                               |                                                                  |   |

|                                            |               |              |               |       |
|--------------------------------------------|---------------|--------------|---------------|-------|
| Age(year, $\bar{x} \pm s$ )                | 87.24±4.75    | 87.18±4.95   | 87.75±5.56    | 0.638 |
| Male(n,%)                                  | 64 (95.52)    | 169 (94.54)  | 90(98.90)     | 0.270 |
| Smoking history(n,%)                       | 19(28.36)     | 60(33.71)    | 44(48.35)     | 0.018 |
| Anemia(n,%)                                | 20(29.85)     | 63(35.39)    | 41(45.05)     | 0.129 |
| DM(n,%)                                    | 37(55.22)     | 93(52.24)    | 34(37.36)     | 0.035 |
| Admission for RTI(n,%)                     | 18(26.86)     | 91 (51.12)   | 83(91.21)     | 0.000 |
| SBP (mmHg, $\bar{x} \pm s$ )               | 129.49±15.11  | 133.96±18.88 | 134.04±19.92  | 0.236 |
| DBP (mmHg, $\bar{x} \pm s$ )               | 67.85±9.40    | 67.71±13.03  | 68.50±11.03   | 0.953 |
| HR (beat/min, $\bar{x} \pm s$ )            | 70.97±12.94   | 73.22±14.61  | 82.20±17.46   | 0.000 |
| BMI (kg/m <sup>2</sup> , $\bar{x} \pm s$ ) | 25.08±3.10    | 24.15±3.09   | 23.03±2.73    | 0.010 |
| Hgb(g/l, $\bar{x} \pm s$ )                 | 125.06±17.23  | 123.01±16.81 | 122.64±18.76  | 0.475 |
| TC(mmol/l, $\bar{x} \pm s$ )               | 4.53±0.08     | 2.77±1.60    | 0.93±1.51     | 0.000 |
| TG(mmol/l, $\bar{x} \pm s$ )               | 1.85±1.28     | 1.15±1.02    | 0.54±0.27     | 0.000 |
| LDL-C(mmol/l, $\bar{x} \pm s$ )            | 2.63±0.61     | 1.76±0.72    | 1.53±0.71     | 0.000 |
| HDL-C(mmol/l, $\bar{x} \pm s$ )            | 1.16±0.36     | 1.03±0.46    | 1.03±0.48     | 0.104 |
| Scr(mmol/l, $\bar{x} \pm s$ )              | 106.66±44.72  | 109.24±53.41 | 110.03±59.36  | 0.941 |
| BUN(mmol/l, $\bar{x} \pm s$ )              | 8.18±3.95     | 9.20±4.61    | 10.21±4.76    | 0.016 |
| UA(umol/l, $\bar{x} \pm s$ )               | 335.51±101.25 | 347.15±97.37 | 321.76±109.13 | 0.081 |
| TP(g/l, $\bar{x} \pm s$ )                  | 69.40±5.25    | 68.75±6.36   | 65.90±7.56    | 0.000 |
| Albumin(g/l, $\bar{x} \pm s$ )             | 40.13±3.31    | 39.49±3.50   | 35.83±4.73    | 0.000 |
| FBS(mmol/l, $\bar{x} \pm s$ )              | 6.26±2.41     | 7.11±2.64    | 7.39±2.60     | 0.021 |
| Prealbumin(mg/dl, $\bar{x} \pm s$ )        | 10.76±12.88   | 17.02±12.05  | 19.15±7.25    | 0.000 |

Table 3. Characteristics of study population and nutritional parameters by different admission reasons

Table 3 Characteristics of the study population and nutritional parameters by different admission reasons

|                         | RTI<br>(n=192) | Other causes<br>(n=144) | Statistical<br>value | P     |
|-------------------------|----------------|-------------------------|----------------------|-------|
| Age(year)               | 87.56±5.29     | 87.25±5.11              | 0.292                | 0.589 |
| Male(n,%)               | 185(96.35%)    | 143(95.97%)             | 0.033                | 0.855 |
| Smoking<br>history(n,%) | 77(40.1%)      | 46(30.87%)              | 3.101                | 0.078 |
| DM(n,%)                 | 88(45.83%)     | 79(53.02%)              | 1.734                | 0.188 |
| Hyperlipidemia(n,%)     | 98(51.04%)     | 79(53.02%)              | 0.132                | 0.717 |
| BMI(kg/m <sup>2</sup> ) | 23.68±3.16     | 24.53±3.00              | 4.991                | 0.026 |
| TP(g/l)                 | 67.79±7.65     | 68.08±5.67              | 0.150                | 0.699 |
| Alb(g/l)                | 37.43±4.62     | 40.00±5.25              | 33.01                | 0.000 |
| Hemoglobin(g/l)         | 122.69±19.10   | 123.61±15.14            | 0.235                | 0.628 |
|                         | 109.40±56.54   | 108.73±48.46            | 0.013                | 0.909 |



|    |               |               |         |       |  |
|----|---------------|---------------|---------|-------|--|
| 1  |               |               |         |       |  |
| 2  |               |               |         |       |  |
| 3  |               |               |         |       |  |
| 4  |               |               |         |       |  |
| 5  | 9.92±5.10     | 8.53±3.84     | 7.670   | 0.006 |  |
| 6  | 7.63±2.75     | 6.19±2.14     | 27.98   | 0.000 |  |
| 7  | 328.74±102.06 | 350.96±104.49 | 3.875   | 0.050 |  |
| 8  | 18.73±8.89    | 13.58±13.65   | 17.645  | 0.000 |  |
| 9  | 97.72±7.68    | 100.49±5.35   | 11.822  | 0.001 |  |
| 10 | 4.19±2.08     | 2.09±1.34     | 112.593 | 0.000 |  |
| 11 |               |               |         |       |  |
| 12 |               |               |         |       |  |
| 13 |               |               |         |       |  |
| 14 |               |               |         |       |  |
| 15 |               |               |         |       |  |
| 16 |               |               |         |       |  |
| 17 |               |               |         |       |  |
| 18 |               |               |         |       |  |
| 19 |               |               |         |       |  |
| 20 |               |               |         |       |  |
| 21 |               |               |         |       |  |
| 22 |               |               |         |       |  |
| 23 |               |               |         |       |  |
| 24 |               |               |         |       |  |
| 25 |               |               |         |       |  |
| 26 |               |               |         |       |  |
| 27 |               |               |         |       |  |
| 28 |               |               |         |       |  |
| 29 |               |               |         |       |  |
| 30 |               |               |         |       |  |
| 31 |               |               |         |       |  |
| 32 |               |               |         |       |  |
| 33 |               |               |         |       |  |
| 34 |               |               |         |       |  |
| 35 |               |               |         |       |  |
| 36 |               |               |         |       |  |
| 37 |               |               |         |       |  |
| 38 |               |               |         |       |  |
| 39 |               |               |         |       |  |
| 40 |               |               |         |       |  |
| 41 |               |               |         |       |  |
| 42 |               |               |         |       |  |
| 43 |               |               |         |       |  |
| 44 |               |               |         |       |  |
| 45 |               |               |         |       |  |
| 46 |               |               |         |       |  |
| 47 |               |               |         |       |  |
| 48 |               |               |         |       |  |
| 49 |               |               |         |       |  |
| 50 |               |               |         |       |  |
| 51 |               |               |         |       |  |
| 52 |               |               |         |       |  |
| 53 |               |               |         |       |  |
| 54 |               |               |         |       |  |
| 55 |               |               |         |       |  |
| 56 |               |               |         |       |  |
| 57 |               |               |         |       |  |
| 58 |               |               |         |       |  |
| 59 |               |               |         |       |  |
| 60 |               |               |         |       |  |

Table 4. Comparison of characteristics of study population and laboratory parameters by different outcomes

Table 4 Comparison of the characteristics of the study population and laboratory parameters by different outcomes

|                          | Death for all cause<br>(n=27) | Survival<br>(n=314) | P     |
|--------------------------|-------------------------------|---------------------|-------|
| Age(year)                | 89.29±4.57                    | 87.26±5.25          | 0.052 |
| Male (n, %)              | 27(100)                       | 308(98.08)          | 0.281 |
| DM (n,%)                 | 15 (55.56)                    | 152 (48.41)         | 0.304 |
| Hyperlipidemia (n,%)     | 12 (44.44)                    | 165 (52.55)         | 0.431 |
| CKD (n,%)                | 9(33.33)                      | 88(28.02)           | 0.667 |
| Anemia (n,%)             | 13(48.15)                     | 112(35.67)          | 0.206 |
| SBP (mmHg)               | 133.29±18.43                  | 126.85±20.16        | 0.085 |
| DBP (mmHg)               | 68.31±12.02                   | 62.48±9.60          | 0.016 |
| BMI (kg/m <sup>2</sup> ) | 22.31±3.31                    | 24.25±3.05          | 0.012 |
| TP(g/l)                  | 67.85±9.59                    | 67.92±6.58          | 0.962 |
| Alb(g/l)                 | 36.37±5.00                    | 38.74±4.16          | 0.005 |
| Hemoglobin (g/l)         | 115.07±20.42                  | 123.78±17.05        | 0.040 |
| Creatinine (umol/l)      | 110.74±61.19                  | 108.97±52.44        | 0.868 |
| BUN(mmol/l)              | 10.86±4.64                    | 9.18±4.62           | 0.071 |
| FBS(mmol/l)              | 8.24±3.51                     | (6.90±2.48)         | 0.010 |
| UA(mmol/l)               | 312.00±82.94                  | 340.72±105.31       | 0.169 |
| Prealbumin(mg/dl)        | 19.21±8.70                    | 16.25±11.68         | 0.200 |

|             |            |            |       |
|-------------|------------|------------|-------|
| COUNT score | 5.14±2.32  | 3.13±1.98  | 0.000 |
| GNRI        | 95.69±7.77 | 99.42±6.55 | 0.026 |

DM: diabetes mellitus; SBP:systolic blood pressure; DBP: diastolic blood pressure;  
 BMI:body mass index; TP:total protein; Alb: albumin; BUN:blood urea nitrogen; UA:uric acid

Table 5. Multivariate Cox regression for all-cause mortality

|                       | B      | Wald  | Sig   | HR    | 95%CI       |
|-----------------------|--------|-------|-------|-------|-------------|
| RTI                   | 0.436  | 4.915 | 0.018 | 1.461 | 1.109–2.791 |
| Chronic heart failure | 0.037  | 1.829 | 0.052 | 1.008 | 0.873–1.059 |
| Age                   | 1.691  | 1.016 | 0.098 | 1.023 | 0.731–1.078 |
| BMI                   | -0.148 | 2.180 | 0.140 | 1.102 | 0.831–1.213 |
| Prealbumin            | 0.025  | 0.675 | 0.411 | 1.026 | 0.965–1.090 |
| GNRI                  | 0.037  | 1.019 | 0.313 | 1.038 | 0.916–1.115 |
| CONUT                 | 0.359  | 5.926 | 0.015 | 1.458 | 1.012–1.911 |

Table 6. Cox regression analysis of common nutritional evaluation index for possible predictors of all-cause mortality by reason of admission

Table 6. Cox regression analysis of common nutritional evaluation index for possible predictors of all-cause mortality by reason of admission

|            | Adjusted HR with 95% CI for RTI |             |       | Adjusted HR with 95% CI for other reasons |             |       |
|------------|---------------------------------|-------------|-------|-------------------------------------------|-------------|-------|
|            | HR                              | 95%CI       | P     | HR                                        | 95%CI       | P     |
| Age        | 1.139                           | 1.007–1.287 | 0.038 | 1.254                                     | 0.873–2.497 | 0.986 |
| BMI        | 0.837                           | 0.676–1.035 | 0.101 | 0.817                                     | 0.364–1.007 | 0.748 |
| Prealbumin | 1.022                           | 0.948–1.102 | 0.573 | 2.418                                     | 0.014–42.28 | 0.633 |
| GNRI       | 1.057                           | 0.978–1.143 | 0.159 | 1.231                                     | 0.816–4.941 | 0.747 |
| CONUT      | 1.284                           | 1.013–1.740 | 0.020 | 1.841                                     | 1.117–4.518 | 0.011 |

Figure 1. All-cause mortality among different nutritional statuses

Figure 2. Kaplan-Meier survival curves for CONUT

Figure 3. Kaplan-Meier survival curves for GNRI

## REFERENCES

1. Anaszewicz M, Budzynski J. Clinical significance of nutritional status in patients with atrial fibrillation: An overview of current evidence. *Journal of cardiology* 2016 doi: 10.1016/j.jjcc.2016.06.014[published Online First: Epub Date]].
2. Arodiwe I, Chinawa J, Ujunwa F, et al. Nutritional status of congenital heart disease (CHD) patients: Burden and determinant of malnutrition at university of Nigeria teaching hospital Ituku - Ozalla, Enugu. *Pakistan journal of medical sciences* 2015;**31**(5):1140-5 doi: 10.12669/pjms.315.6837[published Online First: Epub Date]].
3. Das UN. Nutritional factors in the prevention and management of coronary artery disease and heart failure. *Nutrition* 2015;**31**(2):283-91 doi: 10.1016/j.nut.2014.08.011[published Online First: Epub Date]].
4. Cereda E, Klersy C, Pedrolli C, et al. The Geriatric Nutritional Risk Index predicts hospital length of stay and in-hospital weight loss in elderly patients. *Clinical nutrition* 2015;**34**(1):74-8 doi: 10.1016/j.clnu.2014.01.017[published Online First: Epub Date]].
5. Cereda E, Pedrolli C, Zagami A, et al. Nutritional risk, functional status and mortality in newly institutionalised elderly. *The British journal of nutrition* 2013;**110**(10):1903-9 doi: 10.1017/S0007114513001062[published Online First: Epub Date]].
6. Cereda E, Pedrolli C. The use of the Geriatric Nutritional Risk Index (GNRI) as a simplified nutritional screening tool. *The American journal of clinical nutrition* 2008;**87**(6):1966-7; author reply 67
7. Ignacio de Ulibarri J, Gonzalez-Madrono A, de Villar NG, et al. CONUT: a tool for controlling nutritional status. First validation in a hospital population. *Nutricion hospitalaria* 2005;**20**(1):38-45
8. Iseki Y, Shibutani M, Maeda K, et al. Impact of the Preoperative Controlling Nutritional Status (CONUT) Score on the Survival after Curative Surgery for Colorectal Cancer. *PloS one* 2015;**10**(7):e0132488 doi: 10.1371/journal.pone.0132488[published Online First: Epub Date]].
9. Beberashvili I, Azar A, Sinuani I, et al. Geriatric nutritional risk index, muscle function, quality of life and clinical outcome in hemodialysis patients. *Clinical nutrition* 2016 doi: 10.1016/j.clnu.2016.04.010[published Online First: Epub Date]].
10. Liu LS, Writing Group of Chinese Guidelines for the Management of H. [2010 Chinese guidelines for the management of hypertension]. *Zhonghua xin xue guan bing za zhi* 2011;**39**(7):579-615
11. Luke JN, Schmidt DF, Ritte R, et al. Nutritional predictors of chronic disease in a Central Australian Aboriginal cohort: A multi-mixture modelling analysis. *Nutrition, metabolism, and cardiovascular diseases : NMCD* 2016;**26**(2):162-8 doi: 10.1016/j.numecd.2015.11.009[published Online First: Epub Date]].
12. Yoo SH, Kook HY, Hong YJ, et al. Influence of undernutrition at admission on clinical outcomes in patients with acute myocardial infarction. *Journal of cardiology* 2016 doi: 10.1016/j.jjcc.2016.05.009[published Online First: Epub Date]].
13. Huang BT, Peng Y, Liu W, et al. Nutritional State Predicts All-Cause Death Independent of

- Comorbidities in Geriatric Patients with Coronary Artery Disease. *The journal of nutrition, health & aging* 2016;**20**(2):199-204 doi: 10.1007/s12603-015-0572-2[published Online First: Epub Date]].
14. Nakagomi A, Kohashi K, Morisawa T, et al. Nutritional Status is Associated with Inflammation and Predicts a Poor Outcome in Patients with Chronic Heart Failure. *Journal of atherosclerosis and thrombosis* 2016;**23**(6):713-27 doi: 10.5551/jat.31526[published Online First: Epub Date]].
15. Yoshida N, Baba Y, Shigaki H, et al. Preoperative Nutritional Assessment by Controlling Nutritional Status (CONUT) is Useful to estimate Postoperative Morbidity After Esophagectomy for Esophageal Cancer. *World journal of surgery* 2016;**40**(8):1910-7 doi: 10.1007/s00268-016-3549-3[published Online First: Epub Date]].
16. Du X-J, Tang L-L, Mao Y-P, et al. Value of the prognostic nutritional index and weight loss in predicting metastasis and long-term mortality in nasopharyngeal carcinoma. *Journal of Translational Medicine* 2015;**13**(1) doi: 10.1186/s12967-015-0729-0[published Online First: Epub Date]].
17. Basta G, Chatzianagnostou K, Paradossi U, et al. The prognostic impact of objective nutritional indices in elderly patients with ST-elevation myocardial infarction undergoing primary coronary intervention. *International journal of cardiology* 2016;**221**:987-92 doi: 10.1016/j.ijcard.2016.07.039[published Online First: Epub Date]].
18. Narumi T, Arimoto T, Funayama A, et al. Prognostic importance of objective nutritional indexes in patients with chronic heart failure. *Journal of cardiology* 2013;**62**(5):307-13 doi: 10.1016/j.jjcc.2013.05.007[published Online First: Epub Date]].
19. Cabre M, Ferreiro C, Arus M, et al. Evaluation of CONUT for Clinical Malnutrition Detection and Short-Term Prognostic Assessment in Hospitalized Elderly People. *The journal of nutrition, health & aging* 2015;**19**(7):729-33 doi: 10.1007/s12603-015-0536-6[published Online First: Epub Date]].
20. Cereda E, Pedrolli C, Zagami A, et al. Nutritional screening and mortality in newly institutionalised elderly: a comparison between the geriatric nutritional risk index and the mini nutritional assessment. *Clinical nutrition* 2011;**30**(6):793-8 doi: 10.1016/j.clnu.2011.04.006[published Online First: Epub Date]].
21. Gartner S, Kraft M, Kruger J, et al. Geriatric nutritional risk index correlates with length of hospital stay and inflammatory markers in older inpatients. *Clinical nutrition* 2016 doi: 10.1016/j.clnu.2016.06.019[published Online First: Epub Date]].
22. Formiga F, Ferrer A, Cruzado JM, et al. Geriatric assessment and chronic kidney disease in the oldest old: the Octabaix study. *European journal of internal medicine* 2012;**23**(6):534-8 doi: 10.1016/j.ejim.2012.03.009[published Online First: Epub Date]].
23. Beberashvili I, Erlich A, Azar A, et al. Longitudinal Study of Serum Uric Acid, Nutritional Status, and Mortality in Maintenance Hemodialysis Patients. *Clinical journal of the American Society of Nephrology : CJASN* 2016;**11**(6):1015-23 doi: 10.2215/CJN.10400915[published Online First: Epub Date]].
24. Edalat-Nejad M, Zamani F, Qlich-Khani M, et al. Geriatric nutritional risk index: a mortality predictor in hemodialysis patients. *Saudi journal of kidney diseases and transplantation : an official publication of the Saudi Center for Organ Transplantation, Saudi Arabia* 2015;**26**(2):302-8
25. Kaneko H, Suzuki S, Goto M, et al. Geriatric nutritional risk index in hospitalized heart failure

1  
2  
3 patients. International journal of cardiology 2015;**181**:213-5 doi:  
4 10.1016/j.ijcard.2014.11.167[published Online First: Epub Date] |.

- 5  
6 26. Maruyama K, Nakagawa N, Saito E, et al. Malnutrition, renal dysfunction and left ventricular  
7 hypertrophy synergistically increase the long-term incidence of cardiovascular events.  
8 Hypertens Res 2016;**39**(9):633-9 doi: 10.1038/hr.2016.47[published Online First: Epub Date] |.  
9

10  
11  
12  
13  
14  
15  
16  
17  
18  
19  
20  
21  
22  
23  
24  
25  
26  
27  
28  
29  
30  
31  
32  
33  
34  
35  
36  
37  
38  
39  
40  
41  
42  
43  
44  
45  
46  
47  
48  
49  
50  
51  
52  
53  
54  
55  
56  
57  
58  
59  
60

For peer review only

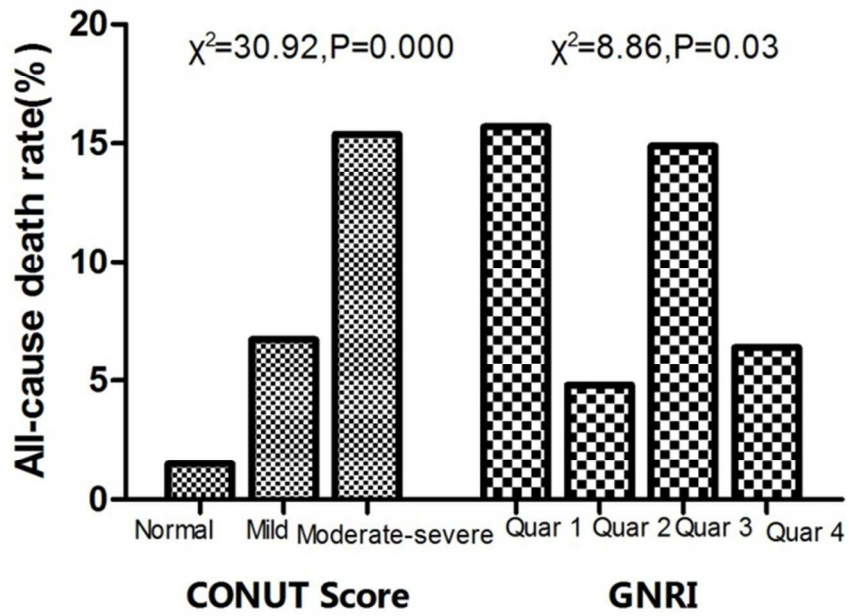

Figure 1. All-cause mortality among different nutritional statuses

76x50mm (300 x 300 DPI)

view only

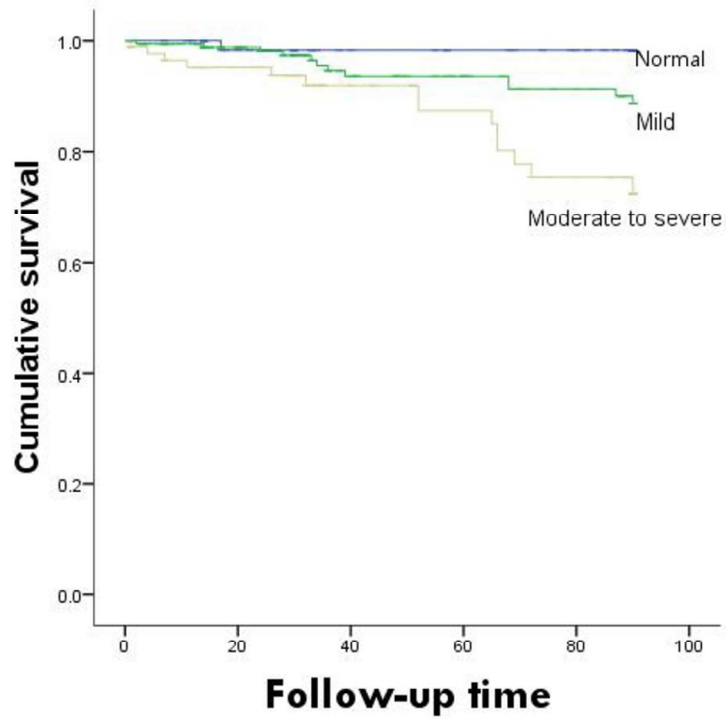

Figure 2. Kaplan-Meier survival curves for CONUT

79x59mm (300 x 300 DPI)

1  
2  
3  
4  
5  
6  
7  
8  
9  
10  
11  
12  
13  
14  
15  
16  
17  
18  
19  
20  
21  
22  
23  
24  
25  
26  
27  
28  
29  
30  
31  
32  
33  
34  
35  
36  
37  
38  
39  
40  
41  
42  
43  
44  
45  
46  
47  
48  
49  
50  
51  
52  
53  
54  
55  
56  
57  
58  
59  
60

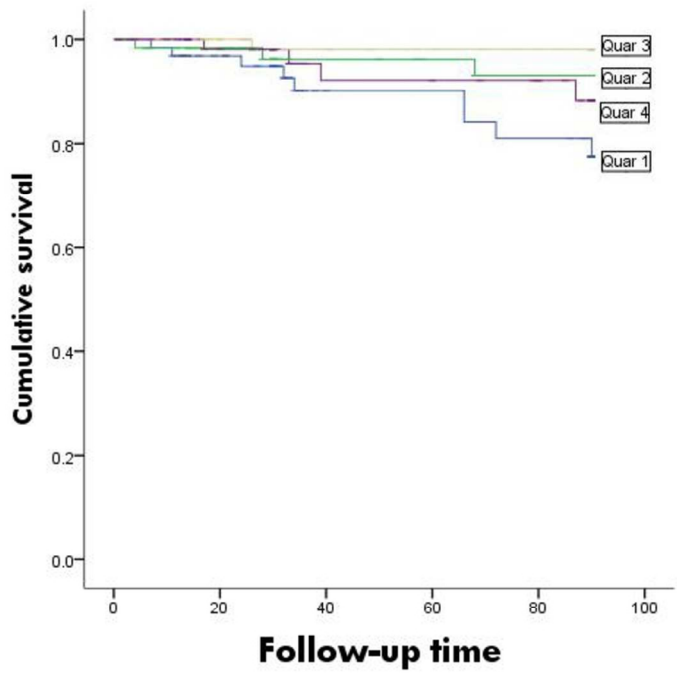

Figure 3. Kaplan-Meier survival curves for GNRI

82x60mm (300 x 300 DPI)

Review only
